# Supplementary material for: Glycome Profiling of Cancer Cell Lines Cultivated in Physiological and Commercial Media
Source: MDPI journal article supplement (doi:10.3390/biom12060743), 2022-05-24
Supplement: s1 [file s1]

# Supporting Information

## Glycome Profiling of Cancer Cell Lines Cultivated in Physiological and Commercial Media

Junyao Wang<sup>1</sup>, Wenjing Peng<sup>1</sup>, Aiying Yu<sup>1</sup>, Mohamed Fokar<sup>2</sup> and Yehia Mechref<sup>1,2\*</sup>

<sup>1</sup> Department of Chemistry and Biochemistry, Texas Tech University, Lubbock TX, 79409

<sup>2</sup> Center of Biotechnology and Genomics, Texas Tech University, Lubbock TX, 79409

Junyao.Wang@ttu.edu (J.W.); Wenjing.Peng@ttu.edu (W.P.); Aiying.Yu@ttu.edu (A.Y.); M.Fokar@ttu.edu (M.F.).

\*Correspondence: Yehia.Mechref@ttu.edu (Y.M.); Tel: 806-742-3059

**Keywords:** Glycomics, Culture media, Cancer cell line, Differential expression analysis, LC-MS/MS

### Table of Contents

**Table S1.** Full list of the formulation of Plasmax.

**Table S2.** Major nutrients and metabolites with different amounts in Plasmax, EMEM and DMEM.

**Table S3.** Relative abundance of (A) *N*-glycans and (B) *O*-glycans from 231BR cell line.

**Table S4.** Relative abundance of (A) *N*-glycans and (B) *O*-glycans from CRL cell line.

**Figure S1.** Nutritional composition of three media: (A) Plasmax, (B) EMEM, and (C) DMEM.

**Figure S2.** Examples of positional structural identification method of (A) *N*-glycan HexNAc<sub>4</sub>Hex<sub>3</sub>DeoxyHex<sub>1</sub> from 231BR cell line and (C) *N*-glycan HexNAc<sub>4</sub>Hex<sub>5</sub>DeoxyHex<sub>1</sub> from CRL cell line using LC-MS/MS. Insets of (A) and (C) are the full MS spectra, (B) and (D) are MS/MS spectra with identified fragment ions assigned to corresponding peaks. Symbols: ■, *N*-acetylglucosamine (GlcNAc); ●, Galactose (Gal); ▼, Fucose (Fuc); ●, Mannose (Man).

**Figure S3.** Heatmaps of significant *N*-glycans from (A) 231BR cell line and (B) CRL cell line. Red color denotes up-regulation, green color denotes down-regulation.

**Figure S4.** Heatmaps of significant *O*-glycans from (A) 231BR cell line and (B) CRL cell line. Color codes are the same as **Figure S3**.

**Figure S5.** Transcript expressions of 231BR cell line. (A) Galactosyltransferases in DMEM and Plasmax; (B) *N*-acetylglucosaminyltransferases in EMEM and Plasmax. (C) Synthesis pathways of complex capping *N*- and *O*-glycans. The red box highlights the processes of connecting galactose to GlcNAc, catalyzed by B4GALT/B3GALT. (D) Synthesis pathways of *N*-glycan processing and branching. Red boxes highlight the processes of attaching GlcNAc to mannose on core structure, catalyzed by MGATs. The synthesis pathways are acquired from GlycoMaple (<https://glycosmos.org/glycomaple/index>).

**Figure S6.** Transcript expressions of CRL cell line. **(A)** *N*-acetylglucosaminyltransferases in EMEM and Plasmax; **(B)** Fucosyltransferases in EMEM and Plasmax. **(C)** Synthesis pathways of *N*-glycan processing and branching. The labeled transcripts of transferases depict the processes of attaching GlcNAc to mannose on core structure, and core-fucosylation, catalyzed by MGATs, and FUT8, respectively. The synthesis pathways are acquired from GlycoMaple (<https://glycosmos.org/glycomaple/index>).

**Figure S7.** Transcript expressions of **(A)** Sialyltransferases in 231BR cell line cultivated by DMEM and Plasmax; **(B)** Fucosyltransferases in CRL cell line cultivated by DMEM and Plasmax. **(C)** Synthesis pathways of complex capping *N*- and *O*-glycans. The labeled transcripts of transferases depict the processes of sialylation catalyzed by ST3GAL or ST6GAL, and fucosylation catalyzed by FUTs. The synthesis pathways are acquired from GlycoMaple (<https://glycosmos.org/glycomaple/index>).

**Table S1.** Full list of the formulation of Plasmax.

| No.      |                                      | (g/mol) | C (μM) | Weight for 1L(mg) |
|----------|--------------------------------------|---------|--------|-------------------|
| <b>1</b> | L-Alanine                            | 89.09   | 510    | 45.44             |
|          | L-Arginine                           | 174.20  | 64     | 11.15             |
|          | L-Asparagine                         | 132.12  | 41     | 5.42              |
|          | L-Aspartic acid                      | 133.10  | 6      | 0.80              |
|          | L-Glutamate                          | 187.13  | 98     | 18.34             |
|          | Glycine                              | 75.07   | 330    | 24.77             |
|          | L-Histidine                          | 155.15  | 120    | 18.62             |
|          | L-Isoleucine                         | 131.17  | 140    | 18.36             |
|          | L-Leucine                            | 131.17  | 170    | 22.30             |
|          | L-Lysine                             | 146.19  | 220    | 32.16             |
|          | L-Methionine                         | 149.21  | 30     | 4.48              |
|          | L-Phenylalanine                      | 165.19  | 68     | 11.23             |
|          | L-Proline                            | 115.13  | 360    | 41.45             |
|          | L-Serine                             | 105.09  | 140    | 14.71             |
|          | L-Threonine                          | 119.12  | 240    | 28.59             |
|          | L-Tryptophan                         | 204.23  | 78     | 15.93             |
|          | L-Tyrosine                           | 181.19  | 74     | 13.41             |
|          | L-Valine                             | 117.15  | 230    | 26.94             |
|          | L-Citrulline                         | 175.19  | 55     | 9.64              |
|          | L-Cystine                            | 240.30  | 65     | 15.62             |
|          | L-Ornithine                          | 168.62  | 80     | 13.49             |
| <b>2</b> | L-Cysteine                           | 121.16  | 33     | 4.00              |
|          | (DL-2-Aminobutyric acid)             | 103.12  | 41     | 4.23              |
|          | L-Homocysteine                       | 135.18  | 9      | 1.22              |
|          | 4-Hydroxy-L-proline                  | 131.13  | 13     | 1.70              |
|          | L-Pyroglutamate                      | 129.11  | 20     | 2.58              |
|          | L-Acetyl glycine                     | 117.10  | 70     | 8.20              |
|          | L-Carnosine                          | 226.23  | 6      | 1.36              |
|          | Glutathione (reduced)                | 307.32  | 37     | 11.37             |
|          | Taurine                              | 125.15  | 130    | 16.27             |
|          | (Betaine)                            | 117.15  | 72     | 8.43              |
|          | Acetate                              | 82.03   | 42     | 3.45              |
|          | Acetone                              | 58.08   | 55     | 3.19              |
|          | (O-Acetyl-L-carnitine hydrochloride) | 239.70  | 5      | 1.20              |
|          | (sodium citrate dihydrate)           | 294.10  | 114    | 33.53             |
|          | Carnitine                            | 197.66  | 46     | 9.09              |

| No. |                                     | (g/mol) | C (μM) | Weight for 1L(mg) |
|-----|-------------------------------------|---------|--------|-------------------|
| 2   | Creatine                            | 131.13  | 37     | 4.85              |
|     | Creatinine                          | 113.12  | 74     | 8.37              |
|     | (sodium formate)                    | 68.01   | 33     | 2.24              |
|     | Glycerol                            | 92.09   | 82     | 7.55              |
|     | (2-hydroxybutyric acid sodium salt) | 126.09  | 31     | 3.91              |
|     | ((+)-sodium 3-hydroxybutyrate)      | 126.09  | 77     | 9.71              |
|     | ((+)-sodium B-hydroxyisobutyrate)   | 126.09  | 20     | 2.52              |
|     | Hypoxanthine                        | 136.11  | 5      | 0.68              |
|     | Lactate                             | 112.06  | 500    | 56.03             |
|     | Methyl acetoacetate                 | 116.12  | 41     | 4.76              |
|     | (di-sodium succinate)               | 162.05  | 23     | 3.73              |
|     | Uracil                              | 112.09  | 2      | 0.22              |
|     | Urea                                | 60.06   | 3000   | 180.17            |
|     | Uridine                             | 244.20  | 3      | 0.73              |
| 3   | Ammonium Chloride                   | 53.49   | 50     | 26.74             |
|     | Ferric Sulfate                      | 399.88  | 1.0428 | 4.17              |
|     | Zinc Sulfate                        | 287.56  | 1.5    | 4.31              |
|     | Ammonium Metavanadate               | 116.98  | 0.0026 | 3.04              |
|     | (copper(II) sulfate)                | 159.61  | 0.0052 | 8.30              |
|     | Ferric Nitrate                      | 404.00  | 0.1238 | 500.15            |
|     | Manganous Chloride                  | 125.84  | 0.0002 | 0.25              |
|     | Sodium Selenite                     | 172.94  | 0.0289 | 49.98             |
| 4   | Urate                               | 190.09  | 270    | 256.62            |
| 5   | L-Glutamine                         | 146.15  | 650    | 94.99             |
|     | BME vitamins                        | -       | -      | -                 |
| 6   | Ascorbate                           | 198.11  | 62     | 1228.28           |
|     | Vitamin B12                         | 1355.37 | 0.005  | 0.68              |
| 7   | EBSS                                | -       | -      | -                 |
| 8   | (sodium pyruvate)                   | 110.04  | 100.00 | 11.00             |

**Table S2.** Major nutrients and metabolites with different amounts in Plasmax, EMEM and DMEM. The commercial media include high abundance of Glucose, Glutamine, *etc.*, while Plasmax mimics the concentration of human blood, and includes metabolites such as Urea and Urate.

| <b>Nutrient</b> | <b>Plasmax</b> | <b>EMEM</b> | <b>DMEM</b> |
|-----------------|----------------|-------------|-------------|
| D-Glucose       | 38.5%          | 43.5%       | 67.8%       |
| Urea            | 20.6%          | -           | -           |
| L-Glutamine     | 4.5%           | 15.7%       | 10.8%       |
| Lactate         | 3.5%           | -           | -           |
| Urate           | 1.9%           | -           | -           |
| L-Threonine     | 1.7%           | 3.1%        | 2.2%        |
| L-Lysine        | 1.5%           | 3.1%        | 2.2%        |
| L-Valine        | 1.6%           | 3.1%        | 2.2%        |
| Glycine         | 2.3%           | 0.8%        | 1.1%        |
| Sodium Pyruvate | 0.7%           | 7.8%        | 2.7%        |

**Table S3A.** Relative abundance of *N*-glycans from 231BR cell line.

| N-glycan                                                                           | Theoretical<br>m/z | Observed<br>m/z | Mass Accuracy<br>(ppm) | DMEM_1  | DMEM_2  | DMEM_3  | Avg     | StdV    | EMEM_1  | EMEM_2  | EMEM_3  | Avg     | StdV    | Plasmax_1 | Plasmax_2 | Plasmax_3 | Avg     | StdV    | P value |      | P value |         | P value |         |
|------------------------------------------------------------------------------------|--------------------|-----------------|------------------------|---------|---------|---------|---------|---------|---------|---------|---------|---------|---------|-----------|-----------|-----------|---------|---------|---------|------|---------|---------|---------|---------|
|                                                                                    |                    |                 |                        |         |         |         |         |         |         |         |         |         |         |           |           |           |         |         | DMEM    | EMEM | DMEM    | Plasmax | EMEM    | Plasmax |
| 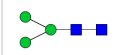   | 1165.6331          | 1165.6321       | 0.86                   | 0.14534 | 0.11589 | 0.12332 | 0.12819 | 0.01531 | 0.13142 | 0.15393 | 0.14448 | 0.14328 | 0.01130 | 0.13446   | 0.11741   | 0.12798   | 0.12662 | 0.00861 | 2.E-01  |      | 9.E-01  |         | 1.E-01  |         |
|    | 889.4702           | 889.4701        | 0.11                   | 0.04093 | 0.06929 | 0.06166 | 0.05729 | 0.01467 | 0.05252 | 0.06470 | 0.06486 | 0.06069 | 0.00708 | 0.08719   | 0.04621   | 0.10012   | 0.07784 | 0.02815 | 7.E-01  |      | 3.E-01  |         | 4.E-01  |         |
|    | 1093.5700          | 1093.5714       | 1.28                   | 0.01909 | 0.02418 | 0.02410 | 0.02246 | 0.00291 | 0.03726 | 0.02527 | 0.02982 | 0.03078 | 0.00605 | 0.03606   | 0.02758   | 0.02703   | 0.03023 | 0.00506 | 1.E-01  |      | 8.E-02  |         | 9.E-01  |         |
|    | 787.4203           | 787.4194        | 1.14                   | 0.02949 | 0.04276 | 0.04173 | 0.03799 | 0.00738 | 0.04075 | 0.03681 | 0.03340 | 0.03698 | 0.00368 | 0.03390   | 0.02595   | 0.03613   | 0.03199 | 0.00535 | 8.E-01  |      | 3.E-01  |         | 3.E-01  |         |
|    | 991.5201           | 991.5196        | 0.50                   | 0.01804 | 0.02805 | 0.03018 | 0.02542 | 0.00648 | 0.03918 | 0.02479 | 0.02135 | 0.02844 | 0.00946 | 0.04125   | 0.02488   | 0.02436   | 0.03016 | 0.00961 | 7.E-01  |      | 5.E-01  |         | 8.E-01  |         |
|    | 1195.6199          | 1195.6218       | 1.59                   | 0.01195 | 0.01051 | 0.01193 | 0.01147 | 0.00082 | 0.02660 | 0.01803 | 0.02147 | 0.02204 | 0.00431 | 0.02764   | 0.01956   | 0.01676   | 0.02132 | 0.00565 | 1.E-02  |      | 4.E-02  |         | 9.E-01  |         |
|    | 1369.7329          | 1369.7328       | 0.07                   | 0.01020 | 0.00978 | 0.00943 | 0.00981 | 0.00039 | 0.00822 | 0.00821 | 0.00771 | 0.00805 | 0.00029 | 0.00648   | 0.00560   | 0.00683   | 0.00630 | 0.00063 | 3.E-03  |      | 1.E-03  |         | 1.E-02  |         |
|    | 867.1213           | 867.1216        | 0.31                   | 0.02426 | 0.02651 | 0.01343 | 0.02140 | 0.00699 | 0.01991 | 0.02534 | 0.04915 | 0.03147 | 0.01556 | 0.01403   | 0.01773   | 0.02319   | 0.01832 | 0.00461 | 4.E-01  |      | 6.E-01  |         | 2.E-01  |         |
|    | 809.0916           | 809.0909        | 0.87                   | 0.00826 | 0.00812 | 0.00441 | 0.00693 | 0.00219 | 0.00698 | 0.00877 | 0.01721 | 0.01099 | 0.00546 | 0.00508   | 0.00708   | 0.01064   | 0.00760 | 0.00282 | 3.E-01  |      | 8.E-01  |         | 4.E-01  |         |
|    | 987.5126           | 987.5132        | 0.64                   | 0.00963 | 0.00865 | 0.00257 | 0.00695 | 0.00382 | 0.00532 | 0.01037 | 0.03027 | 0.01532 | 0.01319 | 0.00352   | 0.00504   | 0.01033   | 0.00630 | 0.00357 | 4.E-01  |      | 8.E-01  |         | 3.E-01  |         |
|    | 1075.5650          | 1075.5642       | 0.74                   | 0.00475 | 0.00459 | 0.00203 | 0.00379 | 0.00153 | 0.00324 | 0.00548 | 0.01103 | 0.00659 | 0.00401 | 0.00214   | 0.00314   | 0.00508   | 0.00345 | 0.00149 | 3.E-01  |      | 8.E-01  |         | 3.E-01  |         |
|    | 929.4828           | 929.4824        | 0.47                   | 0.00147 | 0.00153 | 0.00046 | 0.00115 | 0.00060 | 0.00096 | 0.00234 | 0.00733 | 0.00354 | 0.00335 | 0.00085   | 0.00101   | 0.00261   | 0.00149 | 0.00097 | 3.E-01  |      | 6.E-01  |         | 4.E-01  |         |
|   | 1137.2546          | 1137.2554       | 0.70                   | 0.00115 | 0.00104 | 0.00029 | 0.00083 | 0.00046 | 0.00097 | 0.00176 | 0.00504 | 0.00259 | 0.00216 | 0.00042   | 0.00055   | 0.00104   | 0.00067 | 0.00033 | 2.E-01  |      | 7.E-01  |         | 2.E-01  |         |
|  | 1177.6149          | 1177.6148       | 0.08                   | 0.00054 | 0.00063 | 0.00034 | 0.00051 | 0.00015 | 0.00050 | 0.00060 | 0.00121 | 0.00077 | 0.00039 | 0.00000   | 0.00012   | 0.00040   | 0.00018 | 0.00021 | 3.E-01  |      | 9.E-02  |         | 8.E-02  |         |
|  | 1166.6054          | 1166.6059       | 0.43                   | 0.00036 | 0.00027 | 0.00012 | 0.00025 | 0.00012 | 0.00051 | 0.00037 | 0.00086 | 0.00058 | 0.00025 | 0.00028   | 0.00038   | 0.00028   | 0.00031 | 0.00006 | 1.E-01  |      | 4.E-01  |         | 1.E-01  |         |
|  | 1198.1282          | 1198.1278       | 0.29                   | 0.00040 | 0.00048 | 0.00030 | 0.00039 | 0.00009 | 0.00021 | 0.00036 | 0.00080 | 0.00046 | 0.00031 | 0.00015   | 0.00018   | 0.00052   | 0.00028 | 0.00021 | 7.E-01  |      | 5.E-01  |         | 5.E-01  |         |
|  | 988.5204           | 988.5196        | 0.81                   | 0.00021 | 0.00040 | 0.00011 | 0.00024 | 0.00015 | 0.00019 | 0.00023 | 0.00113 | 0.00052 | 0.00053 | 0.00011   | 0.00017   | 0.00025   | 0.00018 | 0.00007 | 4.E-01  |      | 5.E-01  |         | 3.E-01  |         |
|  | 1257.6458          | 1257.6468       | 0.77                   | 0.00006 | 0.00004 | 0.00001 | 0.00004 | 0.00002 | 0.00004 | 0.00011 | 0.00063 | 0.00026 | 0.00032 | 0.00001   | 0.00001   | 0.00007   | 0.00003 | 0.00003 | 3.E-01  |      | 8.E-01  |         | 3.E-01  |         |
|  | 1065.5494          | 1065.5432       | 5.79                   | 0.00000 | 0.00005 | 0.00010 | 0.00005 | 0.00005 | 0.00007 | 0.00037 | 0.00000 | 0.00015 | 0.00019 | 0.00010   | 0.00087   | 0.00000   | 0.00032 | 0.00048 | 5.E-01  |      | 4.E-01  |         | 6.E-01  |         |

| N-glycan                                                                           | Theoretical<br>m/z | Observed<br>m/z | Mass Accuracy<br>(ppm) | DMEM_1  | DMEM_2  | DMEM_3  | Avg     | StdV    | EMEM_1  | EMEM_2  | EMEM_3  | Avg     | StdV    | Plasmax_1 | Plasmax_2 | Plasmax_3 | Avg     | StdV    | P value |      | P value |         | P value |         |
|------------------------------------------------------------------------------------|--------------------|-----------------|------------------------|---------|---------|---------|---------|---------|---------|---------|---------|---------|---------|-----------|-----------|-----------|---------|---------|---------|------|---------|---------|---------|---------|
|                                                                                    |                    |                 |                        |         |         |         |         |         |         |         |         |         |         |           |           |           |         |         | DMEM    | EMEM | DMEM    | Plasmax | EMEM    | Plasmax |
|    | 1079.2249          | 1079.2255       | 0.59                   | 0.00002 | 0.00003 | 0.00001 | 0.00002 | 0.00001 | 0.00004 | 0.00008 | 0.00022 | 0.00012 | 0.00009 | 0.00002   | 0.00000   | 0.00006   | 0.00003 | 0.00003 | 2.E-01  |      | 8.E-01  |         | 2.E-01  |         |
|    | 1090.5703          | 1090.5707       | 0.37                   | 0.00016 | 0.00021 | 0.00007 | 0.00015 | 0.00007 | 0.00014 | 0.00026 | 0.00048 | 0.00029 | 0.00017 | 0.00000   | 0.00015   | 0.00022   | 0.00012 | 0.00011 | 3.E-01  |      | 8.E-01  |         | 2.E-01  |         |
|    | 1016.8634          | 1016.8635       | 0.13                   | 0.00046 | 0.00044 | 0.00031 | 0.00040 | 0.00008 | 0.00049 | 0.00056 | 0.00121 | 0.00075 | 0.00040 | 0.00019   | 0.00036   | 0.00028   | 0.00028 | 0.00009 | 2.E-01  |      | 1.E-01  |         | 1.E-01  |         |
|    | 948.8301           | 948.8303        | 0.21                   | 0.00001 | 0.00003 | 0.00000 | 0.00001 | 0.00001 | 0.00000 | 0.00000 | 0.00000 | 0.00000 | 0.00000 | 0.00000   | 0.00002   | 0.00004   | 0.00002 | 0.00002 | 2.E-01  |      | 6.E-01  |         | 1.E-01  |         |
|    | 853.4458           | 853.4468        | 1.13                   | 0.00000 | 0.00000 | 0.00000 | 0.00000 | 0.00000 | 0.00015 | 0.00000 | 0.00006 | 0.00007 | 0.00007 | 0.00000   | 0.00001   | 0.00004   | 0.00002 | 0.00002 | 2.E-01  |      | 2.E-01  |         | 3.E-01  |         |
|    | 958.8336           | 958.8334        | 0.24                   | 0.00000 | 0.00000 | 0.00000 | 0.00000 | 0.00000 | 0.00003 | 0.00005 | 0.00009 | 0.00006 | 0.00003 | 0.00003   | 0.00004   | 0.00005   | 0.00004 | 0.00001 | 3.E-02  |      | 7.E-04  |         | 4.E-01  |         |
|    | 1286.9966          | 1286.9981       | 1.14                   | 0.00000 | 0.00000 | 0.00000 | 0.00000 | 0.00000 | 0.00002 | 0.00002 | 0.00006 | 0.00004 | 0.00002 | 0.00001   | 0.00000   | 0.00002   | 0.00001 | 0.00001 | 7.E-02  |      | 2.E-01  |         | 1.E-01  |         |
|    | 1069.2213          | 1069.2228       | 1.37                   | 0.00002 | 0.00001 | 0.00000 | 0.00001 | 0.00001 | 0.00000 | 0.00000 | 0.00000 | 0.00000 | 0.00000 | 0.00000   | 0.00000   | 0.00000   | 0.00000 | 0.00000 | 2.E-01  |      | 2.E-01  |         | -       |         |
|    | 1146.0863          | 1146.0882       | 1.66                   | 0.00002 | 0.00001 | 0.00000 | 0.00001 | 0.00001 | 0.00000 | 0.00000 | 0.00000 | 0.00000 | 0.00000 | 0.00000   | 0.00000   | 0.00000   | 0.00000 | 0.00000 | 2.E-01  |      | 2.E-01  |         | -       |         |
|    | 962.5056           | 962.5058        | 0.21                   | 0.00002 | 0.00000 | 0.00001 | 0.00001 | 0.00001 | 0.00000 | 0.00000 | 0.00000 | 0.00000 | 0.00000 | 0.00000   | 0.00000   | 0.00000   | 0.00000 | 0.00000 | 2.E-01  |      | 2.E-01  |         | -       |         |
|    | 1320.6913          | 1320.6900       | 0.98                   | 0.00006 | 0.00004 | 0.00000 | 0.00003 | 0.00003 | 0.00000 | 0.00000 | 0.00000 | 0.00000 | 0.00000 | 0.00000   | 0.00000   | 0.00000   | 0.00000 | 0.00000 | 1.E-01  |      | 1.E-01  |         | -       |         |
|    | 983.1808           | 983.1754        | 5.49                   | 0.00000 | 0.00000 | 0.00000 | 0.00000 | 0.00000 | 0.00000 | 0.00000 | 0.00000 | 0.00000 | 0.00000 | 0.00001   | 0.00002   | 0.00000   | 0.00001 | 0.00001 | -       |      | 1.E-01  |         | 1.E-01  |         |
|  | 1074.8931          | 1074.8876       | 5.12                   | 0.00000 | 0.00000 | 0.00000 | 0.00000 | 0.00000 | 0.00000 | 0.00000 | 0.00000 | 0.00000 | 0.00000 | 0.00000   | 0.00002   | 0.00001   | 0.00001 | 0.00001 | -       |      | 1.E-01  |         | 1.E-01  |         |
|  | 1123.5791          | 1123.5732       | 5.25                   | 0.00000 | 0.00000 | 0.00000 | 0.00000 | 0.00000 | 0.00002 | 0.00001 | 0.00000 | 0.00001 | 0.00001 | 0.00000   | 0.00000   | 0.00000   | 0.00000 | 0.00000 | 1.E-01  |      | -       |         | 1.E-01  |         |
|  | 1339.7223          | 1339.7212       | 0.82                   | 0.29531 | 0.28459 | 0.32425 | 0.30139 | 0.02051 | 0.38400 | 0.37973 | 0.33742 | 0.36705 | 0.02575 | 0.22729   | 0.24679   | 0.23455   | 0.23621 | 0.00986 | 3.E-02  |      | 8.E-03  |         | 1.E-03  |         |
|  | 915.4914           | 915.4902        | 1.31                   | 0.11912 | 0.11270 | 0.08856 | 0.10679 | 0.01611 | 0.09842 | 0.09476 | 0.08015 | 0.09111 | 0.00967 | 0.14314   | 0.17611   | 0.13621   | 0.15182 | 0.02132 | 2.E-01  |      | 4.E-02  |         | 1.E-02  |         |
|  | 792.9283           | 792.9270        | 1.58                   | 0.07048 | 0.07274 | 0.07440 | 0.07254 | 0.00197 | 0.03118 | 0.04154 | 0.04207 | 0.03827 | 0.00614 | 0.06719   | 0.08499   | 0.06948   | 0.07389 | 0.00968 | 8.E-04  |      | 8.E-01  |         | 6.E-03  |         |
|  | 1038.0546          | 1038.0542       | 0.34                   | 0.02775 | 0.03145 | 0.03265 | 0.03062 | 0.00255 | 0.03108 | 0.02551 | 0.02251 | 0.02637 | 0.00435 | 0.03888   | 0.04873   | 0.04442   | 0.04401 | 0.00494 | 2.E-01  |      | 1.E-02  |         | 1.E-02  |         |
|  | 1160.6177          | 1160.6165       | 1.03                   | 0.01661 | 0.01621 | 0.01846 | 0.01709 | 0.00120 | 0.01147 | 0.00976 | 0.00777 | 0.00967 | 0.00185 | 0.02605   | 0.03423   | 0.02885   | 0.02971 | 0.00416 | 4.E-03  |      | 7.E-03  |         | 2.E-03  |         |
|  | 1119.5912          | 1119.5897       | 1.34                   | 0.02423 | 0.02438 | 0.02424 | 0.02428 | 0.00009 | 0.02026 | 0.01492 | 0.01659 | 0.01726 | 0.00273 | 0.01133   | 0.01337   | 0.01181   | 0.01217 | 0.00107 | 1.E-02  |      | 4.E-05  |         | 4.E-02  |         |
|  | 1017.5413          | 1017.5414       | 0.10                   | 0.01340 | 0.01310 | 0.01411 | 0.01354 | 0.00052 | 0.00821 | 0.00744 | 0.00723 | 0.00763 | 0.00052 | 0.00682   | 0.00849   | 0.00746   | 0.00759 | 0.00084 | 2.E-04  |      | 5.E-04  |         | 1.E+00  |         |

| N-glycan                                                                         | Theoretical<br>m/z | Observed<br>m/z | Mass Accuracy<br>(ppm) | DMEM_1  | DMEM_2  | DMEM_3  | Avg     | StdV    | EMEM_1  | EMEM_2  | EMEM_3  | Avg     | StdV    | Plasmax_1 | Plasmax_2 | Plasmax_3 | Avg     | StdV    | P value |      | P value |         | P value |         |
|----------------------------------------------------------------------------------|--------------------|-----------------|------------------------|---------|---------|---------|---------|---------|---------|---------|---------|---------|---------|-----------|-----------|-----------|---------|---------|---------|------|---------|---------|---------|---------|
|                                                                                  |                    |                 |                        |         |         |         |         |         |         |         |         |         |         |           |           |           |         |         | DMEM    | EMEM | DMEM    | Plasmax | EMEM    | Plasmax |
|  | 894.9782           | 894.9777        | 0.50                   | 0.00914 | 0.00845 | 0.00974 | 0.00911 | 0.00065 | 0.00572 | 0.00809 | 0.00848 | 0.00743 | 0.00149 | 0.00408   | 0.00509   | 0.00377   | 0.00432 | 0.00069 | 1.E-01  |      | 9.E-04  |         | 3.E-02  |         |
|  | 997.0281           | 997.0266        | 1.45                   | 0.00300 | 0.00289 | 0.00325 | 0.00305 | 0.00018 | 0.00200 | 0.00185 | 0.00179 | 0.00188 | 0.00011 | 0.00169   | 0.00222   | 0.00193   | 0.00195 | 0.00026 | 7.E-04  |      | 4.E-03  |         | 7.E-01  |         |
|  | 896.4721           | 896.4724        | 0.30                   | 0.00026 | 0.00034 | 0.00000 | 0.00020 | 0.00018 | 0.00033 | 0.00011 | 0.00017 | 0.00020 | 0.00011 | 0.00020   | 0.00031   | 0.00012   | 0.00021 | 0.00009 | 1.E+00  |      | 9.E-01  |         | 9.E-01  |         |
|  | 1140.1045          | 1140.1035       | 0.83                   | 0.00022 | 0.00023 | 0.00025 | 0.00023 | 0.00001 | 0.00022 | 0.00026 | 0.00017 | 0.00022 | 0.00004 | 0.00008   | 0.00024   | 0.00017   | 0.00016 | 0.00008 | 5.E-01  |      | 2.E-01  |         | 3.E-01  |         |
|  | 1206.6358          | 1206.6353       | 0.41                   | 0.00007 | 0.00000 | 0.00004 | 0.00004 | 0.00004 | 0.00009 | 0.00004 | 0.00007 | 0.00007 | 0.00002 | 0.00014   | 0.00006   | 0.00006   | 0.00009 | 0.00004 | 3.E-01  |      | 2.E-01  |         | 6.E-01  |         |
|  | 1046.2142          | 1046.2155       | 1.27                   | 0.00070 | 0.00051 | 0.00051 | 0.00057 | 0.00011 | 0.00118 | 0.00044 | 0.00039 | 0.00067 | 0.00044 | 0.00070   | 0.00087   | 0.00024   | 0.00061 | 0.00033 | 7.E-01  |      | 9.E-01  |         | 9.E-01  |         |
|  | 705.8837           | 705.8820        | 2.34                   | 0.06007 | 0.05100 | 0.05307 | 0.05471 | 0.00476 | 0.01052 | 0.01000 | 0.00873 | 0.00975 | 0.00092 | 0.04991   | 0.04665   | 0.04149   | 0.04602 | 0.00425 | 9.E-05  |      | 8.E-02  |         | 1.E-04  |         |
|  | 828.4468           | 828.4458        | 1.17                   | 0.02438 | 0.02011 | 0.02135 | 0.02195 | 0.00220 | 0.01105 | 0.00946 | 0.00988 | 0.01013 | 0.00083 | 0.02145   | 0.01998   | 0.01762   | 0.01968 | 0.00193 | 1.E-03  |      | 3.E-01  |         | 1.E-03  |         |
|  | 807.9336           | 807.9330        | 0.68                   | 0.00269 | 0.00253 | 0.00288 | 0.00270 | 0.00018 | 0.00318 | 0.00344 | 0.00340 | 0.00334 | 0.00014 | 0.00256   | 0.00256   | 0.00260   | 0.00257 | 0.00003 | 8.E-03  |      | 3.E-01  |         | 8.E-04  |         |
|  | 951.0100           | 951.0090        | 1.00                   | 0.00244 | 0.00225 | 0.00210 | 0.00226 | 0.00017 | 0.00237 | 0.00171 | 0.00166 | 0.00191 | 0.00040 | 0.00189   | 0.00276   | 0.00239   | 0.00235 | 0.00044 | 2.E-01  |      | 8.E-01  |         | 3.E-01  |         |
|  | 930.4967           | 930.4959        | 0.86                   | 0.00272 | 0.00263 | 0.00289 | 0.00275 | 0.00013 | 0.00198 | 0.00181 | 0.00158 | 0.00179 | 0.00020 | 0.00173   | 0.00193   | 0.00200   | 0.00188 | 0.00014 | 2.E-03  |      | 2.E-03  |         | 5.E-01  |         |
|  | 909.9835           | 909.9858        | 2.58                   | 0.00000 | 0.00000 | 0.00000 | 0.00000 | 0.00000 | 0.00004 | 0.00000 | 0.00005 | 0.00003 | 0.00003 | 0.00000   | 0.00000   | 0.00000   | 0.00000 | 0.00000 | 1.E-01  |      | -       |         | 1.E-01  |         |



Table S3B. Relative abundance of *O*-glycans from 231BR cell line.

| HexNac-Hex-deHex-NeuAc | Theoretical<br>m/z | Observed<br>m/z | Mass Accuracy<br>(ppm) | DMEM_1  | DMEM_2  | DMEM_3  | Avg     | StdV    | EMEM_1  | EMEM_2  | EMEM_3  | Avg     | StdV    | Plasmax_1 | Plasmax_2 | Plasmax_3 | Avg     | StdV    | P value<br>DMEM EMEM | P value<br>DMEM Plasmax | P value<br>EMEM Plasmax |
|------------------------|--------------------|-----------------|------------------------|---------|---------|---------|---------|---------|---------|---------|---------|---------|---------|-----------|-----------|-----------|---------|---------|----------------------|-------------------------|-------------------------|
| 1-1-0-0                | 496.2759           | 496.2747        | 2.42                   | 0.14092 | 0.12548 | 0.13383 | 0.13341 | 0.00773 | 0.20084 | 0.07218 | 0.14972 | 0.14091 | 0.06478 | 0.18388   | 0.10796   | 0.11889   | 0.13691 | 0.04105 | 9.E-01               | 9.E-01                  | 9.E-01                  |
| 1-1-0-1                | 857.4496           | 857.4486        | 1.17                   | 0.05241 | 0.08641 | 0.07308 | 0.07063 | 0.01713 | 0.00000 | 0.00000 | 0.00000 | 0.00000 | 0.00000 | 0.04649   | 0.04676   | 0.04153   | 0.04493 | 0.00294 | 2.E-03               | 6.E-02                  | 1.E-05                  |
| 1-1-0-2                | 1218.6233          | 1218.6225       | 0.66                   | 0.04644 | 0.05116 | 0.06372 | 0.05377 | 0.00893 | 0.00000 | 0.00000 | 0.00000 | 0.00000 | 0.00000 | 0.00000   | 0.00000   | 0.00000   | 0.00000 | 0.00000 | 5.E-04               | 5.E-04                  | -                       |
| 1-1-1-0                | 670.3651           | 670.3642        | 1.34                   | 0.11051 | 0.14842 | 0.16353 | 0.14082 | 0.02731 | 0.03552 | 0.02231 | 0.07429 | 0.04404 | 0.02702 | 0.10567   | 0.07384   | 0.11256   | 0.09736 | 0.02065 | 1.E-02               | 9.E-02                  | 5.E-02                  |
| 2-0-0-1                | 898.4761           | 898.4751        | 1.11                   | 0.00000 | 0.00000 | 0.00000 | 0.00000 | 0.00000 | 0.06087 | 0.02981 | 0.01732 | 0.03600 | 0.02243 | 0.00724   | 0.00347   | 0.00593   | 0.00555 | 0.00191 | 5.E-02               | 7.E-03                  | 8.E-02                  |
| 2-0-1-1                | 1072.5653          | 1072.5597       | 5.22                   | 0.00000 | 0.00000 | 0.00000 | 0.00000 | 0.00000 | 0.00000 | 0.00000 | 0.00000 | 0.00000 | 0.00000 | 0.07636   | 0.10316   | 0.14077   | 0.10676 | 0.03236 | -                    | 5.E-03                  | 5.E-03                  |
| 2-2-0-1                | 1306.6757          | 1306.6798       | 3.14                   | 0.00499 | 0.00332 | 0.00314 | 0.00382 | 0.00102 | 0.00000 | 0.00000 | 0.00000 | 0.00000 | 0.00000 | 0.00441   | 0.00576   | 0.00401   | 0.00473 | 0.00092 | 3.E-03               | 3.E-01                  | 9.E-04                  |
| 2-2-0-2                | 834.4287           | 834.4326        | 4.73                   | 0.08357 | 0.06962 | 0.05435 | 0.06918 | 0.01461 | 0.04803 | 0.09475 | 0.07836 | 0.07372 | 0.02370 | 0.08464   | 0.07477   | 0.06285   | 0.07409 | 0.01091 | 8.E-01               | 7.E-01                  | 1.E+00                  |
| 2-3-0-0                | 1149.6018          | 1149.6000       | 1.57                   | 0.00000 | 0.00000 | 0.00000 | 0.00000 | 0.00000 | 0.04209 | 0.04229 | 0.15751 | 0.08063 | 0.06658 | 0.00000   | 0.00000   | 0.00000   | 0.00000 | 0.00000 | 1.E-01               | -                       | 1.E-01                  |
| 2-3-1-0                | 1323.6910          | 1323.6919       | 0.68                   | 0.00000 | 0.00000 | 0.00000 | 0.00000 | 0.00000 | 0.01602 | 0.01191 | 0.00723 | 0.01172 | 0.00440 | 0.00000   | 0.00000   | 0.00000   | 0.00000 | 0.00000 | 1.E-02               | -                       | 1.E-02                  |
| 2-5-0-3                | 1321.1652          | 1321.1639       | 0.98                   | 0.00430 | 0.00256 | 0.00405 | 0.00364 | 0.00094 | 0.00000 | 0.00000 | 0.00000 | 0.00000 | 0.00000 | 0.00299   | 0.00453   | 0.00403   | 0.00385 | 0.00078 | 3.E-03               | 8.E-01                  | 1.E-03                  |
| 2-6-0-0                | 881.4546           | 881.4527        | 2.10                   | 0.01366 | 0.02731 | 0.03049 | 0.02382 | 0.00894 | 0.00000 | 0.00000 | 0.00000 | 0.00000 | 0.00000 | 0.00000   | 0.00000   | 0.00000   | 0.00000 | 0.00000 | 1.E-02               | 1.E-02                  | -                       |
| 2-7-0-0                | 983.5045           | 983.5031        | 1.37                   | 0.02693 | 0.03611 | 0.01996 | 0.02767 | 0.00810 | 0.01045 | 0.02830 | 0.02928 | 0.02268 | 0.01060 | 0.00000   | 0.00000   | 0.00000   | 0.00000 | 0.00000 | 6.E-01               | 4.E-03                  | 2.E-02                  |
| 2-8-0-0                | 1085.5544          | 1085.5535       | 0.78                   | 0.06827 | 0.05631 | 0.03627 | 0.05362 | 0.01617 | 0.03719 | 0.06182 | 0.09174 | 0.06359 | 0.02732 | 0.03950   | 0.02322   | 0.03930   | 0.03401 | 0.00934 | 6.E-01               | 1.E-01                  | 2.E-01                  |
| 2-9-0-0                | 1187.6043          | 1187.6030       | 1.05                   | 0.04799 | 0.03670 | 0.03780 | 0.04083 | 0.00622 | 0.02435 | 0.04250 | 0.07544 | 0.04743 | 0.02590 | 0.02591   | 0.02480   | 0.03884   | 0.02985 | 0.00781 | 7.E-01               | 1.E-01                  | 3.E-01                  |
| 2-10-0-0               | 1289.6542          | 1289.6527       | 1.12                   | 0.00718 | 0.00602 | 0.00700 | 0.00673 | 0.00062 | 0.00000 | 0.00000 | 0.00000 | 0.00000 | 0.00000 | 0.00130   | 0.00112   | 0.00068   | 0.00104 | 0.00032 | 5.E-05               | 1.E-04                  | 5.E-03                  |
| 3-1-0-0                | 986.5285           | 986.5230        | 5.58                   | 0.01027 | 0.00872 | 0.01107 | 0.01002 | 0.00120 | 0.00000 | 0.00000 | 0.00000 | 0.00000 | 0.00000 | 0.01181   | 0.00567   | 0.00214   | 0.00654 | 0.00489 | 1.E-04               | 3.E-01                  | 8.E-02                  |
| 3-2-1-0                | 1364.7175          | 1364.7095       | 5.86                   | 0.03933 | 0.01608 | 0.02063 | 0.02535 | 0.01232 | 0.00000 | 0.00000 | 0.00000 | 0.00000 | 0.00000 | 0.06074   | 0.02659   | 0.03823   | 0.04185 | 0.01736 | 2.E-02               | 3.E-01                  | 1.E-02                  |
| 3-3-2-2                | 1233.1309          | 1233.1272       | 3.00                   | 0.27838 | 0.22305 | 0.26468 | 0.25537 | 0.02882 | 0.44900 | 0.48766 | 0.24433 | 0.39366 | 0.13076 | 0.28405   | 0.37090   | 0.30358   | 0.31951 | 0.04557 | 1.E-01               | 1.E-01                  | 4.E-01                  |
| 3-4-1-1                | 1067.5494          | 1067.5485       | 0.80                   | 0.00739 | 0.02083 | 0.01060 | 0.01294 | 0.00702 | 0.00260 | 0.00473 | 0.01322 | 0.00685 | 0.00562 | 0.00191   | 0.00200   | 0.00296   | 0.00229 | 0.00058 | 3.E-01               | 6.E-02                  | 2.E-01                  |
| 5-5-0-0                | 1147.0941          | 1147.0884       | 4.97                   | 0.00654 | 0.00301 | 0.00250 | 0.00402 | 0.00220 | 0.00118 | 0.00307 | 0.00536 | 0.00320 | 0.00209 | 0.00218   | 0.00181   | 0.00361   | 0.00253 | 0.00095 | 7.E-01               | 3.E-01                  | 6.E-01                  |
| 5-6-0-0                | 1249.1440          | 1249.1406       | 2.72                   | 0.00000 | 0.00000 | 0.00000 | 0.00000 | 0.00000 | 0.00176 | 0.00242 | 0.00352 | 0.00257 | 0.00089 | 0.00604   | 0.00465   | 0.00773   | 0.00614 | 0.00154 | 7.E-03               | 2.E-03                  | 3.E-02                  |
| 5-6-2-0                | 949.1581           | 949.1601        | 2.11                   | 0.00000 | 0.00000 | 0.00000 | 0.00000 | 0.00000 | 0.00000 | 0.00000 | 0.00000 | 0.00000 | 0.00000 | 0.00146   | 0.00184   | 0.00150   | 0.00160 | 0.00021 | -                    | 2.E-04                  | 2.E-04                  |
| 6-5-0-0                | 1269.6573          | 1269.6597       | 1.93                   | 0.00000 | 0.00000 | 0.00000 | 0.00000 | 0.00000 | 0.00000 | 0.00000 | 0.00000 | 0.00000 | 0.00000 | 0.00007   | 0.00159   | 0.00044   | 0.00070 | 0.00079 | -                    | 2.E-01                  | 2.E-01                  |
| 6-5-0-1                | 967.1654           | 967.1700        | 4.79                   | 0.00615 | 0.00646 | 0.00629 | 0.00630 | 0.00016 | 0.00000 | 0.00000 | 0.00000 | 0.00000 | 0.00000 | 0.00791   | 0.01602   | 0.00822   | 0.01072 | 0.00459 | 3.E-07               | 2.E-01                  | 2.E-02                  |
| 6-5-1-0                | 904.8039           | 904.8074        | 3.91                   | 0.03803 | 0.04609 | 0.04800 | 0.04404 | 0.00529 | 0.05844 | 0.08655 | 0.03513 | 0.06004 | 0.02575 | 0.03762   | 0.08329   | 0.05405   | 0.05832 | 0.02313 | 4.E-01               | 4.E-01                  | 9.E-01                  |
| 6-6-1-0                | 972.8371           | 972.8339        | 3.32                   | 0.00671 | 0.02633 | 0.00899 | 0.01401 | 0.01073 | 0.01166 | 0.00969 | 0.01756 | 0.01297 | 0.00409 | 0.00783   | 0.01622   | 0.00816   | 0.01073 | 0.00475 | 9.E-01               | 7.E-01                  | 6.E-01                  |

**Table S4A.** Relative abundance of *N*-glycans from CRL cell line.

| N-glycan                                                                           | Theoretical<br>m/z | Observed<br>m/z | Mass Accuracy<br>(ppm) | DMEM_1  | DMEM_2  | DMEM_3  | Avg     | StdV    | EMEM_1  | EMEM_2  | EMEM_3  | Avg     | StdV    | Plasmax_1 | Plasmax_2 | Plasmax_3 | Avg     | StdV    | P value<br>DMEM EMEM |  | P value<br>DMEM Plasmax |  | P value<br>EMEM Plasmax |  |
|------------------------------------------------------------------------------------|--------------------|-----------------|------------------------|---------|---------|---------|---------|---------|---------|---------|---------|---------|---------|-----------|-----------|-----------|---------|---------|----------------------|--|-------------------------|--|-------------------------|--|
| 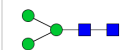   | 1165.6331          | 1165.6291       | 3.43                   | 0.21055 | 0.18422 | 0.21313 | 0.20263 | 0.01599 | 0.17248 | 0.19654 | 0.16777 | 0.17893 | 0.01543 | 0.16628   | 0.18673   | 0.20616   | 0.18639 | 0.01994 | 1.E-01               |  | 3.E-01                  |  | 6.E-01                  |  |
|    | 787.4203           | 787.4170        | 4.19                   | 0.09155 | 0.08322 | 0.06792 | 0.08090 | 0.01199 | 0.07327 | 0.07669 | 0.08165 | 0.07720 | 0.00421 | 0.09355   | 0.08259   | 0.07849   | 0.08488 | 0.00778 | 6.E-01               |  | 7.E-01                  |  | 2.E-01                  |  |
|    | 991.5201           | 991.5171        | 3.03                   | 0.04261 | 0.03763 | 0.04168 | 0.04064 | 0.00265 | 0.04329 | 0.03566 | 0.03786 | 0.03894 | 0.00393 | 0.04423   | 0.04238   | 0.04119   | 0.04260 | 0.00153 | 6.E-01               |  | 3.E-01                  |  | 2.E-01                  |  |
|    | 1369.7329          | 1369.7280       | 3.58                   | 0.03597 | 0.04067 | 0.02885 | 0.03516 | 0.00595 | 0.01737 | 0.02186 | 0.02849 | 0.02257 | 0.00559 | 0.02268   | 0.02518   | 0.02763   | 0.02516 | 0.00247 | 6.E-02               |  | 5.E-02                  |  | 5.E-01                  |  |
|    | 889.4702           | 889.4676        | 2.92                   | 0.10993 | 0.08923 | 0.08996 | 0.09637 | 0.01175 | 0.10608 | 0.10047 | 0.11217 | 0.10624 | 0.00585 | 0.12566   | 0.12052   | 0.10540   | 0.11719 | 0.01053 | 3.E-01               |  | 8.E-02                  |  | 2.E-01                  |  |
|    | 1093.5700          | 1093.5673       | 2.47                   | 0.03858 | 0.03745 | 0.03831 | 0.03811 | 0.00059 | 0.05542 | 0.04198 | 0.04021 | 0.04587 | 0.00831 | 0.05115   | 0.05328   | 0.04768   | 0.05070 | 0.00283 | 2.E-01               |  | 2.E-03                  |  | 4.E-01                  |  |
|    | 1075.5650          | 1075.5610       | 3.72                   | 0.01138 | 0.01282 | 0.01036 | 0.01152 | 0.00123 | 0.01562 | 0.01489 | 0.01394 | 0.01482 | 0.00084 | 0.00967   | 0.01035   | 0.00801   | 0.00934 | 0.00120 | 2.E-02               |  | 9.E-02                  |  | 3.E-03                  |  |
|    | 948.8301           | 948.8270        | 3.27                   | 0.00594 | 0.00641 | 0.00699 | 0.00645 | 0.00053 | 0.00694 | 0.00633 | 0.00504 | 0.00610 | 0.00097 | 0.00794   | 0.00932   | 0.00879   | 0.00869 | 0.00070 | 6.E-01               |  | 1.E-02                  |  | 2.E-02                  |  |
|    | 1098.5721          | 1098.5686       | 3.22                   | 0.00343 | 0.00467 | 0.00455 | 0.00422 | 0.00069 | 0.00215 | 0.00312 | 0.00254 | 0.00261 | 0.00049 | 0.00469   | 0.00585   | 0.00583   | 0.00546 | 0.00067 | 3.E-02               |  | 9.E-02                  |  | 4.E-03                  |  |
|    | 1016.8634          | 1016.8600       | 3.31                   | 0.00090 | 0.00123 | 0.00113 | 0.00109 | 0.00017 | 0.00249 | 0.00255 | 0.00226 | 0.00243 | 0.00015 | 0.00130   | 0.00170   | 0.00147   | 0.00149 | 0.00020 | 5.E-04               |  | 5.E-02                  |  | 3.E-03                  |  |
|    | 1192.6202          | 1192.6160       | 3.52                   | 0.00082 | 0.00117 | 0.00112 | 0.00104 | 0.00019 | 0.00083 | 0.00093 | 0.00105 | 0.00094 | 0.00011 | 0.00000   | 0.00086   | 0.00070   | 0.00052 | 0.00046 | 5.E-01               |  | 1.E-01                  |  | 2.E-01                  |  |
|   | 1079.2249          | 1079.2213       | 3.30                   | 0.00036 | 0.00059 | 0.00052 | 0.00049 | 0.00012 | 0.00117 | 0.00121 | 0.00108 | 0.00116 | 0.00007 | 0.00166   | 0.00257   | 0.00232   | 0.00218 | 0.00047 | 1.E-03               |  | 4.E-03                  |  | 2.E-02                  |  |
|  | 958.8336           | 958.8307        | 3.06                   | 0.00000 | 0.00000 | 0.00000 | 0.00000 | 0.00000 | 0.00111 | 0.00119 | 0.00089 | 0.00107 | 0.00015 | 0.00112   | 0.00154   | 0.00126   | 0.00131 | 0.00022 | 3.E-04               |  | 5.E-04                  |  | 2.E-01                  |  |
|  | 1199.6161          | 1199.6127       | 2.83                   | 0.00000 | 0.00000 | 0.00000 | 0.00000 | 0.00000 | 0.00000 | 0.00000 | 0.00000 | 0.00000 | 0.00000 | 0.00060   | 0.00097   | 0.00078   | 0.00079 | 0.00018 | -                    |  | 2.E-03                  |  | 2.E-03                  |  |
|  | 1198.1282          | 1198.1240       | 3.46                   | 0.00000 | 0.00000 | 0.00000 | 0.00000 | 0.00000 | 0.00096 | 0.00099 | 0.00075 | 0.00090 | 0.00013 | 0.00000   | 0.00000   | 0.00000   | 0.00000 | 0.00000 | 3.E-04               |  | -                       |  | 3.E-04                  |  |
|  | 1300.1781          | 1300.1739       | 3.19                   | 0.01183 | 0.01454 | 0.01454 | 0.01364 | 0.00157 | 0.03183 | 0.03033 | 0.03108 | 0.03108 | 0.00075 | 0.02673   | 0.02514   | 0.02546   | 0.02578 | 0.00084 | 6.E-05               |  | 3.E-04                  |  | 1.E-03                  |  |
|  | 1213.1335          | 1213.1286       | 4.00                   | 0.00816 | 0.00979 | 0.00910 | 0.00902 | 0.00082 | 0.02149 | 0.02030 | 0.01932 | 0.02037 | 0.00109 | 0.02082   | 0.02131   | 0.01690   | 0.01967 | 0.00242 | 1.E-04               |  | 2.E-03                  |  | 7.E-01                  |  |
|  | 988.5204           | 988.5166        | 3.84                   | 0.00498 | 0.00523 | 0.00427 | 0.00483 | 0.00050 | 0.00944 | 0.00939 | 0.00891 | 0.00925 | 0.00030 | 0.00615   | 0.00794   | 0.00656   | 0.00688 | 0.00093 | 2.E-04               |  | 3.E-02                  |  | 1.E-02                  |  |
|  | 929.4828           | 929.4794        | 3.69                   | 0.00188 | 0.00245 | 0.00300 | 0.00244 | 0.00056 | 0.00371 | 0.00344 | 0.00359 | 0.00358 | 0.00013 | 0.00474   | 0.00526   | 0.00446   | 0.00482 | 0.00040 | 3.E-02               |  | 4.E-03                  |  | 7.E-03                  |  |
|  | 987.5126           | 987.5094        | 3.21                   | 0.00148 | 0.00194 | 0.00149 | 0.00163 | 0.00026 | 0.00539 | 0.00514 | 0.00476 | 0.00510 | 0.00032 | 0.00500   | 0.00712   | 0.00566   | 0.00593 | 0.00108 | 1.E-04               |  | 3.E-03                  |  | 3.E-01                  |  |

| N-glycan | Theoretical<br>m/z | Observed<br>m/z | Mass Accuracy<br>(ppm) | DMEM_1  | DMEM_2  | DMEM_3  | Avg     | StdV    | EMEM_1  | EMEM_2  | EMEM_3  | Avg     | StdV    | Plasmax_1 | Plasmax_2 | Plasmax_3 | Avg     | StdV    | P value |      | P value |         | P value |         |
|----------|--------------------|-----------------|------------------------|---------|---------|---------|---------|---------|---------|---------|---------|---------|---------|-----------|-----------|-----------|---------|---------|---------|------|---------|---------|---------|---------|
|          |                    |                 |                        |         |         |         |         |         |         |         |         |         |         |           |           |           |         |         | DMEM    | EMEM | DMEM    | Plasmax | EMEM    | Plasmax |
|          | 1090.5703          | 1090.5667       | 3.30                   | 0.00125 | 0.00140 | 0.00098 | 0.00121 | 0.00021 | 0.00160 | 0.00192 | 0.00174 | 0.00175 | 0.00016 | 0.00173   | 0.00177   | 0.00180   | 0.00177 | 0.00003 | 3.E-02  |      | 1.E-02  |         | 9.E-01  |         |
|          | 890.8004           | 890.7973        | 3.44                   | 0.00106 | 0.00153 | 0.00155 | 0.00138 | 0.00028 | 0.00147 | 0.00136 | 0.00151 | 0.00145 | 0.00008 | 0.00170   | 0.00185   | 0.00195   | 0.00183 | 0.00013 | 7.E-01  |      | 6.E-02  |         | 1.E-02  |         |
|          | 1137.2546          | 1137.2505       | 3.61                   | 0.00047 | 0.00133 | 0.00113 | 0.00098 | 0.00045 | 0.00164 | 0.00172 | 0.00170 | 0.00169 | 0.00004 | 0.00245   | 0.00217   | 0.00269   | 0.00244 | 0.00026 | 5.E-02  |      | 8.E-03  |         | 8.E-03  |         |
|          | 1040.5424          | 1040.5392       | 3.08                   | 0.00000 | 0.00000 | 0.00000 | 0.00000 | 0.00000 | 0.00000 | 0.00000 | 0.00000 | 0.00000 | 0.00000 | 0.00000   | 0.00069   | 0.00063   | 0.00044 | 0.00038 | -       |      | 1.E-01  |         | 1.E-01  |         |
|          | 1339.7223          | 1339.7176       | 3.51                   | 0.23384 | 0.24774 | 0.25452 | 0.24537 | 0.01054 | 0.12348 | 0.12649 | 0.14056 | 0.13018 | 0.00912 | 0.15465   | 0.15426   | 0.17760   | 0.16217 | 0.01336 | 1.E-04  |      | 1.E-03  |         | 3.E-02  |         |
|          | 1242.1544          | 1242.1496       | 3.82                   | 0.03353 | 0.03727 | 0.04211 | 0.03764 | 0.00430 | 0.02791 | 0.02208 | 0.02842 | 0.02614 | 0.00353 | 0.04433   | 0.03223   | 0.03641   | 0.03766 | 0.00614 | 2.E-02  |      | 1.E+00  |         | 5.E-02  |         |
|          | 915.4914           | 915.4878        | 3.93                   | 0.01821 | 0.02321 | 0.02299 | 0.02147 | 0.00282 | 0.05584 | 0.05662 | 0.05456 | 0.05567 | 0.00104 | 0.03683   | 0.03326   | 0.03029   | 0.03346 | 0.00327 | 4.E-05  |      | 9.E-03  |         | 4.E-04  |         |
|          | 1140.1045          | 1140.0999       | 3.99                   | 0.01689 | 0.01943 | 0.02178 | 0.01937 | 0.00245 | 0.00949 | 0.00878 | 0.00877 | 0.00902 | 0.00041 | 0.01862   | 0.01646   | 0.01548   | 0.01685 | 0.00161 | 2.E-03  |      | 2.E-01  |         | 1.E-03  |         |
|          | 792.9283           | 792.9250        | 4.10                   | 0.01652 | 0.02045 | 0.01932 | 0.01877 | 0.00203 | 0.04517 | 0.04538 | 0.04730 | 0.04595 | 0.00118 | 0.01903   | 0.01891   | 0.01770   | 0.01855 | 0.00073 | 4.E-05  |      | 9.E-01  |         | 4.E-06  |         |
|          | 1119.5912          | 1119.5871       | 3.66                   | 0.00778 | 0.00933 | 0.00920 | 0.00877 | 0.00086 | 0.01919 | 0.01747 | 0.01683 | 0.01783 | 0.00122 | 0.01041   | 0.00270   | 0.00381   | 0.00564 | 0.00417 | 5.E-04  |      | 3.E-01  |         | 8.E-03  |         |
|          | 1038.0546          | 1038.0507       | 3.71                   | 0.00752 | 0.00913 | 0.00875 | 0.00847 | 0.00084 | 0.01451 | 0.01403 | 0.01252 | 0.01369 | 0.00104 | 0.01081   | 0.00913   | 0.00827   | 0.00940 | 0.00129 | 2.E-03  |      | 4.E-01  |         | 1.E-02  |         |
|          | 894.9782           | 894.9747        | 3.85                   | 0.00649 | 0.00738 | 0.00527 | 0.00638 | 0.00106 | 0.00828 | 0.00853 | 0.00867 | 0.00849 | 0.00020 | 0.00584   | 0.00536   | 0.00499   | 0.00540 | 0.00043 | 3.E-02  |      | 2.E-01  |         | 3.E-04  |         |
|          | 1017.5413          | 1017.5377       | 3.54                   | 0.00278 | 0.00349 | 0.00298 | 0.00308 | 0.00037 | 0.01093 | 0.01047 | 0.00895 | 0.01012 | 0.00104 | 0.00322   | 0.00432   | 0.00332   | 0.00362 | 0.00061 | 4.E-04  |      | 3.E-01  |         | 7.E-04  |         |
|          | 1160.6177          | 1160.6134       | 3.70                   | 0.00235 | 0.00346 | 0.00305 | 0.00295 | 0.00056 | 0.00769 | 0.00799 | 0.00719 | 0.00762 | 0.00040 | 0.00451   | 0.00397   | 0.00367   | 0.00405 | 0.00042 | 3.E-04  |      | 5.E-02  |         | 4.E-04  |         |
|          | 1262.6676          | 1262.6631       | 3.56                   | 0.00091 | 0.00118 | 0.00122 | 0.00111 | 0.00017 | 0.00115 | 0.00137 | 0.00125 | 0.00126 | 0.00011 | 0.00103   | 0.00087   | 0.00069   | 0.00086 | 0.00017 | 3.E-01  |      | 2.E-01  |         | 3.E-02  |         |
|          | 896.4721           | 896.4687        | 3.83                   | 0.00046 | 0.00053 | 0.00063 | 0.00054 | 0.00008 | 0.00121 | 0.00112 | 0.00114 | 0.00115 | 0.00004 | 0.00000   | 0.00000   | 0.00000   | 0.00000 | 0.00000 | 3.E-04  |      | 4.E-04  |         | 1.E-06  |         |
|          | 997.0281           | 997.0246        | 3.46                   | 0.00069 | 0.00073 | 0.00048 | 0.00063 | 0.00013 | 0.00071 | 0.00075 | 0.00068 | 0.00071 | 0.00003 | 0.00000   | 0.00000   | 0.00000   | 0.00000 | 0.00000 | 4.E-01  |      | 1.E-03  |         | 3.E-06  |         |
|          | 954.5019           | 954.5021        | 0.24                   | 0.00065 | 0.00046 | 0.00065 | 0.00059 | 0.00011 | 0.00000 | 0.00000 | 0.00000 | 0.00000 | 0.00000 | 0.00000   | 0.00000   | 0.00000   | 0.00000 | 0.00000 | 7.E-04  |      | 7.E-04  |         | -       |         |
|          | 978.1809           | 978.1783        | 2.66                   | 0.00218 | 0.00255 | 0.00318 | 0.00264 | 0.00050 | 0.00405 | 0.00365 | 0.00244 | 0.00338 | 0.00084 | 0.00433   | 0.00355   | 0.00342   | 0.00377 | 0.00049 | 3.E-01  |      | 5.E-02  |         | 5.E-01  |         |
|          | 1221.6411          | 1221.6424       | 1.06                   | 0.00122 | 0.00097 | 0.00126 | 0.00115 | 0.00016 | 0.00278 | 0.00201 | 0.00276 | 0.00252 | 0.00044 | 0.00309   | 0.00166   | 0.00122   | 0.00199 | 0.00097 | 7.E-03  |      | 2.E-01  |         | 4.E-01  |         |
|          | 910.1476           | 910.1441        | 3.88                   | 0.00064 | 0.00094 | 0.00054 | 0.00071 | 0.00021 | 0.00081 | 0.00089 | 0.00066 | 0.00079 | 0.00012 | 0.00071   | 0.00000   | 0.00075   | 0.00049 | 0.00042 | 6.E-01  |      | 5.E-01  |         | 3.E-01  |         |

| N-glycan                                                                         | Theoretical<br>m/z | Observed<br>m/z | Mass Accuracy<br>(ppm) | DMEM_1  | DMEM_2  | DMEM_3  | Avg     | StdV    | EMEM_1  | EMEM_2  | EMEM_3  | Avg     | StdV    | Plasmax_1 | Plasmax_2 | Plasmax_3 | Avg     | StdV    | P value |      | P value |         | P value |         |
|----------------------------------------------------------------------------------|--------------------|-----------------|------------------------|---------|---------|---------|---------|---------|---------|---------|---------|---------|---------|-----------|-----------|-----------|---------|---------|---------|------|---------|---------|---------|---------|
|                                                                                  |                    |                 |                        |         |         |         |         |         |         |         |         |         |         |           |           |           |         |         | DMEM    | EMEM | DMEM    | Plasmax | EMEM    | Plasmax |
| 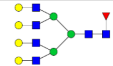 | 1046.2142          | 1046.2102       | 3.79                   | 0.00052 | 0.00103 | 0.00104 | 0.00086 | 0.00030 | 0.00152 | 0.00160 | 0.00109 | 0.00141 | 0.00027 | 0.00114   | 0.00093   | 0.00104   | 0.00103 | 0.00010 | 8.E-02  |      | 4.E-01  |         | 9.E-02  |         |
|  | 1053.0599          | 1053.0561       | 3.56                   | 0.01212 | 0.01472 | 0.01273 | 0.01319 | 0.00136 | 0.00866 | 0.00760 | 0.00725 | 0.00784 | 0.00074 | 0.01627   | 0.01544   | 0.01318   | 0.01497 | 0.00160 | 4.E-03  |      | 2.E-01  |         | 2.E-03  |         |
|  | 705.8837           | 705.8803        | 4.75                   | 0.00789 | 0.00829 | 0.00701 | 0.00773 | 0.00066 | 0.01581 | 0.01917 | 0.01895 | 0.01798 | 0.00188 | 0.00727   | 0.00902   | 0.00750   | 0.00793 | 0.00095 | 9.E-04  |      | 8.E-01  |         | 1.E-03  |         |
|  | 828.4468           | 828.4438        | 3.62                   | 0.00781 | 0.00909 | 0.00817 | 0.00836 | 0.00066 | 0.02188 | 0.02339 | 0.02133 | 0.02220 | 0.00106 | 0.01141   | 0.01375   | 0.01268   | 0.01261 | 0.00117 | 4.E-05  |      | 5.E-03  |         | 5.E-04  |         |
|  | 930.4967           | 930.4923        | 4.73                   | 0.00223 | 0.00237 | 0.00215 | 0.00225 | 0.00011 | 0.00842 | 0.00880 | 0.00711 | 0.00811 | 0.00088 | 0.00249   | 0.00310   | 0.00259   | 0.00273 | 0.00033 | 3.E-04  |      | 7.E-02  |         | 6.E-04  |         |
|  | 807.9336           | 807.9304        | 3.90                   | 0.00770 | 0.00871 | 0.00602 | 0.00748 | 0.00136 | 0.00831 | 0.00859 | 0.00787 | 0.00826 | 0.00037 | 0.00533   | 0.00733   | 0.00596   | 0.00621 | 0.00102 | 4.E-01  |      | 3.E-01  |         | 3.E-02  |         |
|  | 1155.1098          | 1155.1049       | 4.20                   | 0.00386 | 0.00279 | 0.00132 | 0.00266 | 0.00128 | 0.00259 | 0.00348 | 0.00260 | 0.00289 | 0.00051 | 0.00488   | 0.00849   | 0.00434   | 0.00591 | 0.00226 | 8.E-01  |      | 1.E-01  |         | 9.E-02  |         |
|  | 951.0100           | 951.0065        | 3.63                   | 0.00285 | 0.00424 | 0.00153 | 0.00287 | 0.00136 | 0.00575 | 0.00585 | 0.00504 | 0.00555 | 0.00044 | 0.00384   | 0.00424   | 0.00372   | 0.00393 | 0.00027 | 3.E-02  |      | 3.E-01  |         | 6.E-03  |         |
|  | 1032.5466          | 1032.5426       | 3.87                   | 0.00220 | 0.00258 | 0.00223 | 0.00234 | 0.00021 | 0.00161 | 0.00000 | 0.00357 | 0.00173 | 0.00179 | 0.00428   | 0.00406   | 0.00460   | 0.00431 | 0.00027 | 6.E-01  |      | 6.E-04  |         | 7.E-02  |         |
|  | 920.1512           | 920.1477        | 3.77                   | 0.00103 | 0.00127 | 0.00129 | 0.00120 | 0.00014 | 0.00146 | 0.00151 | 0.00122 | 0.00140 | 0.00015 | 0.00218   | 0.00249   | 0.00219   | 0.00229 | 0.00017 | 2.E-01  |      | 1.E-03  |         | 3.E-03  |         |

**Table S4B.** Relative abundance of *O*-glycans from CRL cell line.

| HexNac-Hex-deHex-NeuAc | Theoretical<br>m/z | Observed<br>m/z | Mass Accuracy<br>(ppm) | DMEM_1  | DMEM_2  | DMEM_3  | Avg     | StdV    | EMEM_1  | EMEM_2  | EMEM_3  | Avg     | StdV    | Plasmax_1 | Plasmax_2 | Plasmax_3 | Avg     | StdV    | P value<br>DMEM EMEM | P value<br>DMEM Plasmax | P value<br>EMEM Plasmax |
|------------------------|--------------------|-----------------|------------------------|---------|---------|---------|---------|---------|---------|---------|---------|---------|---------|-----------|-----------|-----------|---------|---------|----------------------|-------------------------|-------------------------|
| 1-1-0-1                | 857.4496           | 857.4486        | 1.17                   | 0.00000 | 0.00000 | 0.00000 | 0.00000 | 0.00000 | 0.00000 | 0.00000 | 0.00000 | 0.00000 | 0.00000 | 0.11934   | 0.07092   | 0.08655   | 0.09227 | 0.02471 | -                    | 3.E-03                  | 3.E-03                  |
| 2-0-1-1                | 1072.5653          | 1072.5571       | 7.65                   | 0.10652 | 0.04425 | 0.11048 | 0.08708 | 0.03715 | 0.37118 | 0.33991 | 0.32090 | 0.34400 | 0.02539 | 0.09332   | 0.02185   | 0.03067   | 0.04862 | 0.03897 | 6.E-04               | 3.E-01                  | 4.E-04                  |
| 2-2-0-0                | 945.5020           | 945.5003        | 1.80                   | 0.00000 | 0.00000 | 0.00000 | 0.00000 | 0.00000 | 0.00000 | 0.00000 | 0.00000 | 0.00000 | 0.00000 | 0.07376   | 0.03149   | 0.02733   | 0.04419 | 0.02569 | -                    | 4.E-02                  | 4.E-02                  |
| 2-2-0-2                | 834.4287           | 834.4302        | 1.86                   | 0.11649 | 0.11144 | 0.09427 | 0.10740 | 0.01164 | 0.07308 | 0.09308 | 0.16299 | 0.10972 | 0.04721 | 0.14829   | 0.09584   | 0.11341   | 0.11918 | 0.02670 | 9.E-01               | 5.E-01                  | 8.E-01                  |
| 2-3-0-1                | 755.8917           | 755.8985        | 9.00                   | 0.00000 | 0.00000 | 0.00000 | 0.00000 | 0.00000 | 0.13479 | 0.09992 | 0.14667 | 0.12713 | 0.02430 | 0.00000   | 0.00000   | 0.00000   | 0.00000 | 0.00000 | 8.E-04               | -                       | 8.E-04                  |
| 2-4-0-3                | 1219.1153          | 1219.1103       | 4.10                   | 0.01152 | 0.00925 | 0.00956 | 0.01011 | 0.00123 | 0.00000 | 0.00000 | 0.00000 | 0.00000 | 0.00000 | 0.01196   | 0.01667   | 0.01286   | 0.01383 | 0.00250 | 1.E-04               | 8.E-02                  | 7.E-04                  |
| 2-4-3-2                | 1299.6623          | 1299.6696       | 5.66                   | 0.00209 | 0.00409 | 0.00190 | 0.00269 | 0.00121 | 0.00000 | 0.00000 | 0.00000 | 0.00000 | 0.00000 | 0.00000   | 0.00000   | 0.00000   | 0.00000 | 0.00000 | 2.E-02               | 2.E-02                  | -                       |
| 2-5-0-3                | 1321.1652          | 1321.1607       | 3.41                   | 0.01505 | 0.01350 | 0.01747 | 0.01534 | 0.00200 | 0.00000 | 0.00000 | 0.00000 | 0.00000 | 0.00000 | 0.00704   | 0.01043   | 0.00965   | 0.00904 | 0.00178 | 2.E-04               | 2.E-02                  | 9.E-04                  |
| 2-5-1-2                | 1227.6230          | 1227.6227       | 0.20                   | 0.01076 | 0.01717 | 0.00629 | 0.01141 | 0.00547 | 0.00000 | 0.00000 | 0.00000 | 0.00000 | 0.00000 | 0.01134   | 0.01526   | 0.01138   | 0.01266 | 0.00225 | 2.E-02               | 7.E-01                  | 6.E-04                  |
| 2-5-3-0                | 1040.5385          | 1040.5296       | 8.51                   | 0.01718 | 0.01381 | 0.01593 | 0.01564 | 0.00170 | 0.00839 | 0.00880 | 0.01233 | 0.00984 | 0.00217 | 0.00957   | 0.00900   | 0.00475   | 0.00777 | 0.00264 | 2.E-02               | 1.E-02                  | 4.E-01                  |
| 2-6-0-0                | 881.4546           | 881.4550        | 0.51                   | 0.04208 | 0.05225 | 0.03547 | 0.04327 | 0.00846 | 0.00000 | 0.00000 | 0.00000 | 0.00000 | 0.00000 | 0.05210   | 0.06255   | 0.02096   | 0.04520 | 0.02163 | 9.E-04               | 9.E-01                  | 2.E-02                  |
| 2-7-0-0                | 983.5045           | 983.5003        | 4.22                   | 0.07074 | 0.09787 | 0.06330 | 0.07730 | 0.01820 | 0.00000 | 0.00000 | 0.00000 | 0.00000 | 0.00000 | 0.05895   | 0.09481   | 0.06823   | 0.07400 | 0.01861 | 2.E-03               | 8.E-01                  | 2.E-03                  |
| 2-8-0-0                | 1085.5544          | 1085.5504       | 3.64                   | 0.14158 | 0.19399 | 0.15193 | 0.16250 | 0.02776 | 0.09054 | 0.10621 | 0.06935 | 0.08870 | 0.01850 | 0.11576   | 0.19044   | 0.17486   | 0.16035 | 0.03939 | 2.E-02               | 9.E-01                  | 5.E-02                  |
| 2-9-0-0                | 1187.6043          | 1187.5997       | 3.83                   | 0.09194 | 0.11829 | 0.11604 | 0.10876 | 0.01461 | 0.06618 | 0.08794 | 0.04565 | 0.06659 | 0.02115 | 0.05644   | 0.09409   | 0.10082   | 0.08378 | 0.02391 | 5.E-02               | 2.E-01                  | 4.E-01                  |
| 2-10-0-0               | 1289.6542          | 1289.6502       | 3.06                   | 0.02075 | 0.02228 | 0.02539 | 0.02281 | 0.00236 | 0.00000 | 0.00000 | 0.00000 | 0.00000 | 0.00000 | 0.01053   | 0.01993   | 0.01168   | 0.01405 | 0.00513 | 8.E-05               | 5.E-02                  | 9.E-03                  |
| 3-1-2-2                | 1029.0311          | 1029.0233       | 7.58                   | 0.01224 | 0.00866 | 0.00962 | 0.01018 | 0.00185 | 0.00000 | 0.00000 | 0.00000 | 0.00000 | 0.00000 | 0.00848   | 0.00358   | 0.00000   | 0.00402 | 0.00425 | 7.E-04               | 8.E-02                  | 2.E-01                  |
| 3-3-1-1                | 965.4995           | 965.4937        | 5.96                   | 0.04284 | 0.05107 | 0.03954 | 0.04448 | 0.00594 | 0.00000 | 0.00000 | 0.00000 | 0.00000 | 0.00000 | 0.00880   | 0.02624   | 0.01890   | 0.01798 | 0.00875 | 2.E-04               | 1.E-02                  | 2.E-02                  |
| 3-3-1-3                | 1326.6732          | 1326.6718       | 1.02                   | 0.01909 | 0.01139 | 0.01911 | 0.01653 | 0.00445 | 0.01878 | 0.01678 | 0.01341 | 0.01632 | 0.00271 | 0.00000   | 0.00000   | 0.00000   | 0.00000 | 0.00000 | 9.E-01               | 3.E-03                  | 5.E-04                  |
| 3-3-2-2                | 1233.1309          | 1233.1227       | 6.65                   | 0.03943 | 0.02948 | 0.03357 | 0.03416 | 0.00500 | 0.03478 | 0.03209 | 0.02517 | 0.03068 | 0.00496 | 0.01972   | 0.02283   | 0.02229   | 0.02161 | 0.00166 | 4.E-01               | 1.E-02                  | 4.E-02                  |
| 3-4-1-1                | 1067.5494          | 1067.5441       | 4.92                   | 0.03319 | 0.01316 | 0.02023 | 0.02219 | 0.01016 | 0.01487 | 0.03276 | 0.02275 | 0.02346 | 0.00897 | 0.01281   | 0.03787   | 0.03338   | 0.02802 | 0.01336 | 9.E-01               | 6.E-01                  | 6.E-01                  |
| 3-5-1-1                | 1169.5993          | 1169.5921       | 6.11                   | 0.01417 | 0.01931 | 0.01861 | 0.01736 | 0.00279 | 0.00767 | 0.00910 | 0.01123 | 0.00933 | 0.00179 | 0.00566   | 0.01422   | 0.01581   | 0.01190 | 0.00546 | 1.E-02               | 2.E-01                  | 5.E-01                  |
| 4-4-0-3                | 976.4970           | 976.4917        | 5.46                   | 0.00654 | 0.00627 | 0.00899 | 0.00727 | 0.00150 | 0.01246 | 0.00780 | 0.00704 | 0.00910 | 0.00294 | 0.00225   | 0.00412   | 0.00994   | 0.00544 | 0.00401 | 4.E-01               | 5.E-01                  | 3.E-01                  |
| 4-9-0-0                | 955.4897           | 955.4866        | 3.21                   | 0.00445 | 0.00503 | 0.00846 | 0.00598 | 0.00217 | 0.00000 | 0.00000 | 0.00000 | 0.00000 | 0.00000 | 0.00330   | 0.00439   | 0.01799   | 0.00856 | 0.00818 | 9.E-03               | 6.E-01                  | 1.E-01                  |
| 5-5-0-1                | 1327.6810          | 1327.6714       | 7.19                   | 0.00306 | 0.00551 | 0.00223 | 0.00360 | 0.00171 | 0.00308 | 0.00587 | 0.00395 | 0.00430 | 0.00143 | 0.00199   | 0.00233   | 0.00320   | 0.00250 | 0.00062 | 6.E-01               | 4.E-01                  | 1.E-01                  |
| 5-5-1-0                | 1234.1387          | 1234.1275       | 9.08                   | 0.00489 | 0.00518 | 0.00620 | 0.00542 | 0.00069 | 0.00000 | 0.00000 | 0.00000 | 0.00000 | 0.00000 | 0.00548   | 0.00434   | 0.00407   | 0.00463 | 0.00075 | 2.E-04               | 2.E-01                  | 4.E-04                  |
| 6-3-1-0                | 1152.6021          | 1152.5974       | 4.03                   | 0.02459 | 0.02037 | 0.02539 | 0.02345 | 0.00269 | 0.02755 | 0.03101 | 0.02480 | 0.02779 | 0.00311 | 0.01279   | 0.01514   | 0.00948   | 0.01247 | 0.00284 | 1.E-01               | 8.E-03                  | 3.E-03                  |
| 6-4-0-1                | 1348.1942          | 1348.1842       | 7.42                   | 0.04674 | 0.04763 | 0.05414 | 0.04950 | 0.00404 | 0.03001 | 0.02480 | 0.02849 | 0.02777 | 0.00268 | 0.01008   | 0.00763   | 0.00951   | 0.00907 | 0.00128 | 1.E-03               | 8.E-05                  | 4.E-04                  |
| 6-4-1-0                | 1254.6520          | 1254.6478       | 3.31                   | 0.05771 | 0.04319 | 0.05420 | 0.05170 | 0.00758 | 0.05257 | 0.05474 | 0.04422 | 0.05051 | 0.00555 | 0.02869   | 0.03563   | 0.03797   | 0.03410 | 0.00483 | 8.E-01               | 3.E-02                  | 2.E-02                  |
| 6-5-0-1                | 967.1654           | 967.1707        | 5.51                   | 0.01670 | 0.01543 | 0.01914 | 0.01709 | 0.00189 | 0.02057 | 0.02015 | 0.01295 | 0.01789 | 0.00428 | 0.10971   | 0.08623   | 0.13941   | 0.11178 | 0.02665 | 8.E-01               | 4.E-03                  | 4.E-03                  |
| 6-5-1-0                | 904.8039           | 904.8009        | 3.28                   | 0.02640 | 0.01808 | 0.03041 | 0.02496 | 0.00629 | 0.03049 | 0.02557 | 0.04500 | 0.03369 | 0.01010 | 0.00000   | 0.00000   | 0.00000   | 0.00000 | 0.00000 | 3.E-01               | 2.E-03                  | 4.E-03                  |
| 6-6-0-1                | 1035.1986          | 1035.1938       | 4.67                   | 0.00127 | 0.00205 | 0.00212 | 0.00181 | 0.00047 | 0.00298 | 0.00348 | 0.00311 | 0.00319 | 0.00026 | 0.00185   | 0.00218   | 0.00491   | 0.00298 | 0.00168 | 1.E-02               | 3.E-01                  | 8.E-01                  |

**Figure S1**

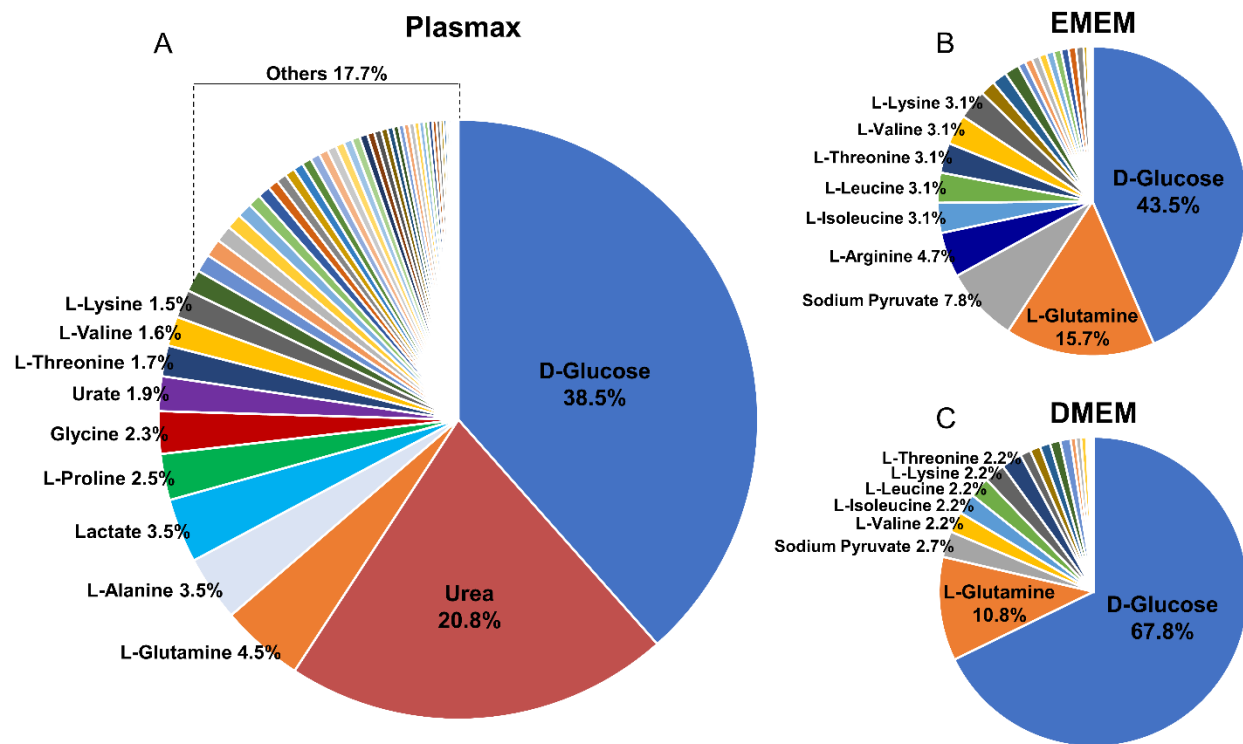

**Figure S1.** Nutritional composition of three media: **(A)** Plasmax, **(B)** EMEM, and **(C)** DMEM.

**Figure S2**

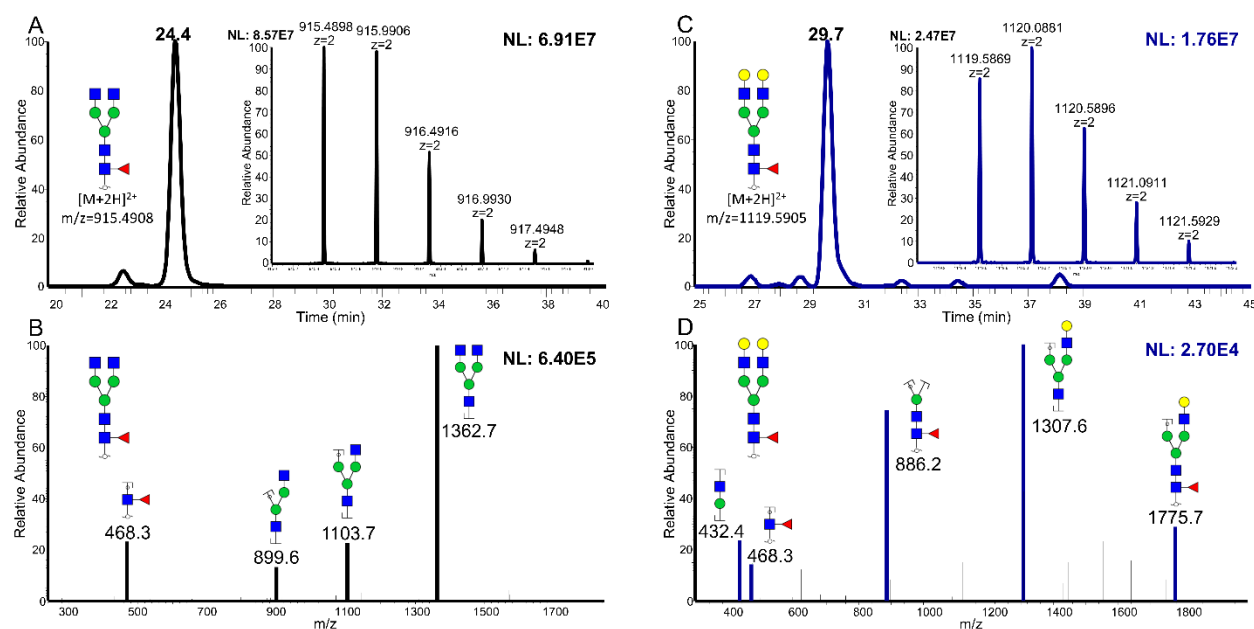

**Figure S2.** Examples of positional structural identification method of (A) *N*-glycan HexNAc<sub>4</sub>Hex<sub>3</sub>DeoxyHex<sub>1</sub> from 231BR cell line and (C) *N*-glycan HexNAc<sub>4</sub>Hex<sub>5</sub>DeoxyHex<sub>1</sub> from CRL cell line using LC-MS/MS. Insets of (A) and (C) are the full MS spectra, (B) and (D) are MS/MS spectra with identified fragment ions assigned to corresponding peaks. Symbols: ■, N-acetylglucosamine (GlcNAc); ●, Galactose (Gal); ▼, Fucose (Fuc); ●, Mannose (Man).

**Figure S3**

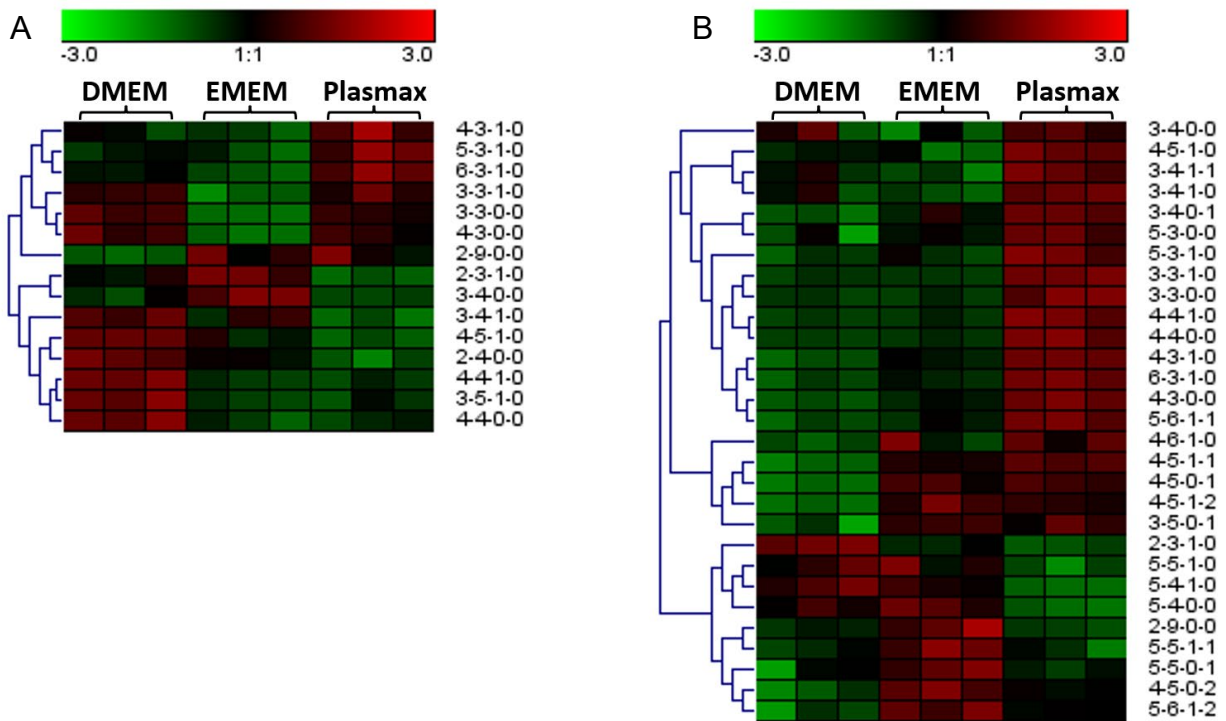

**Figure S3.** Heatmaps of significant *N*-glycans from **(A)** 231BR cell line and **(B)** CRL cell line. Red color denotes up-regulation, green color denotes down-regulation.



Figure S4

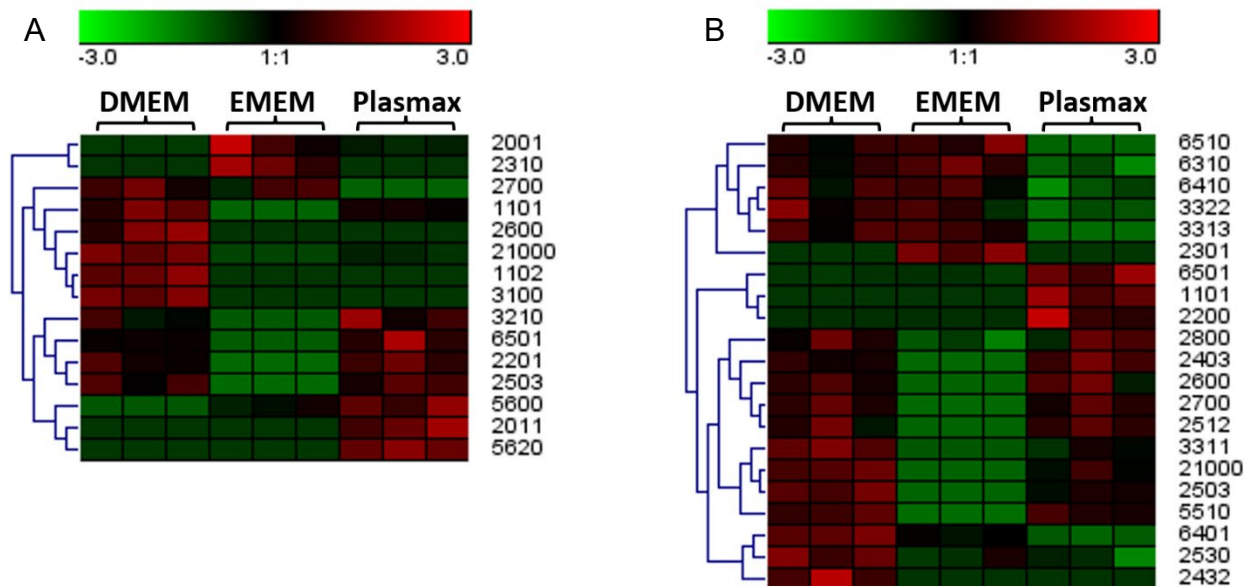

**Figure S4.** Heatmaps of significant *O*-glycans from (A) 231BR cell line and (B) CRL cell line. Red color denotes up-regulation, green color denotes down-regulation.

Figure S5

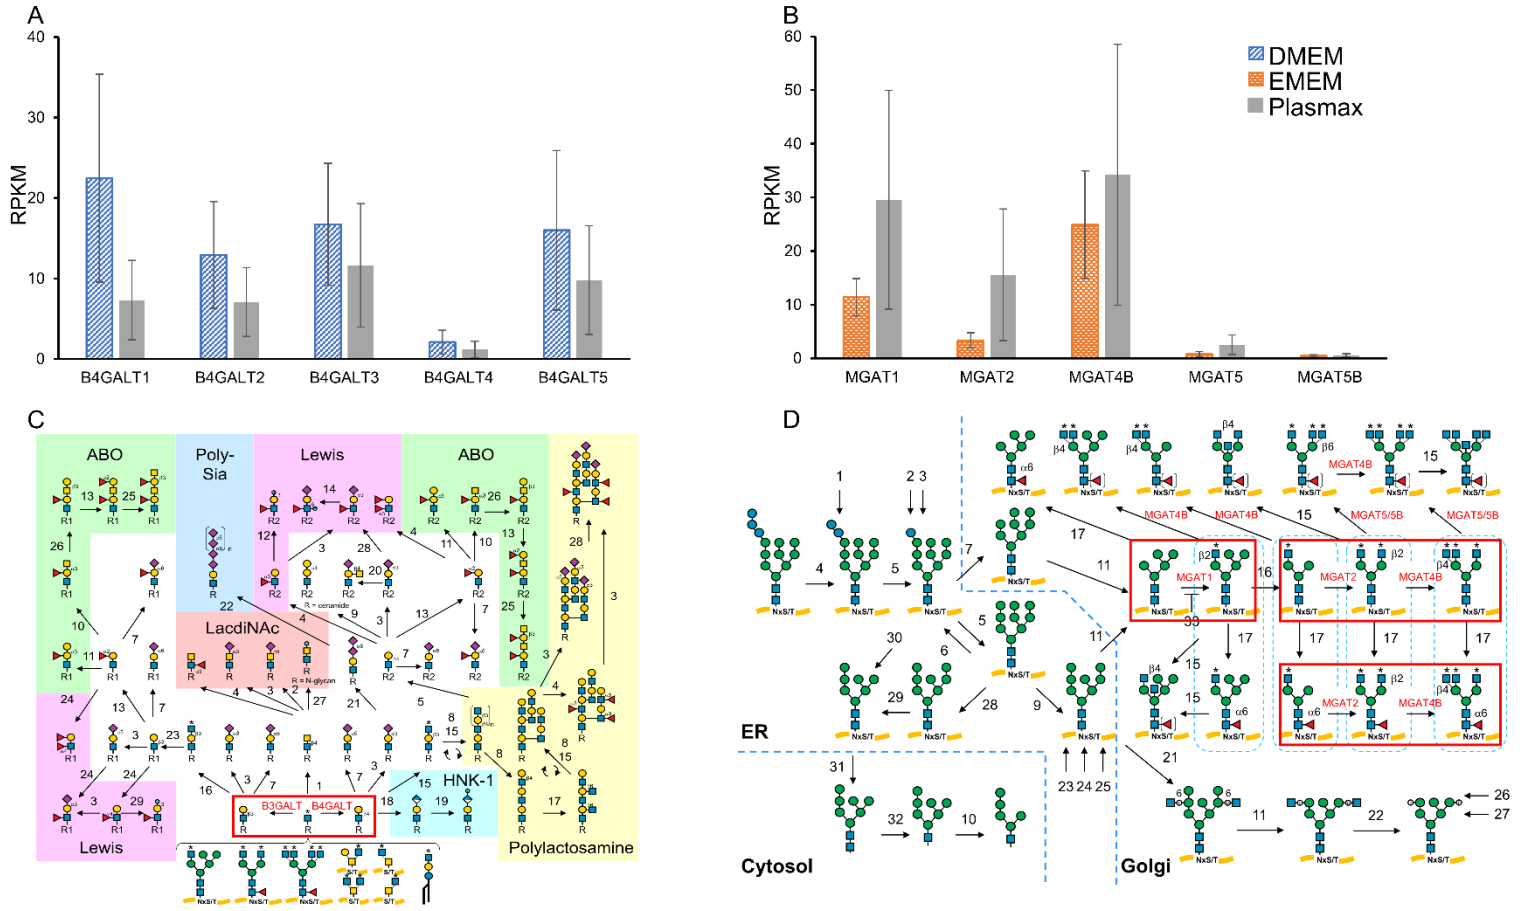

**Figure S5.** Transcript expressions of 231BR cell line. **(A)** Galactosyltransferases in DMEM and Plasmax; **(B)** *N*-acetylglucosaminyltransferases in EMEM and Plasmax. **(C)** Synthesis pathways of complex capping *N*- and *O*-glycans. The red box highlights the processes of connecting galactose to GlcNAc, catalyzed by B4GALT/B3GALT. **(D)** Synthesis pathways of *N*-glycan processing and branching. Red boxes highlight the processes of attaching GlcNAc to mannose on core structure, catalyzed by MGATs. The synthesis pathways are acquired from GlycoMaple (<https://glycosmos.org/glycomaple/index>).

**Figure S6**

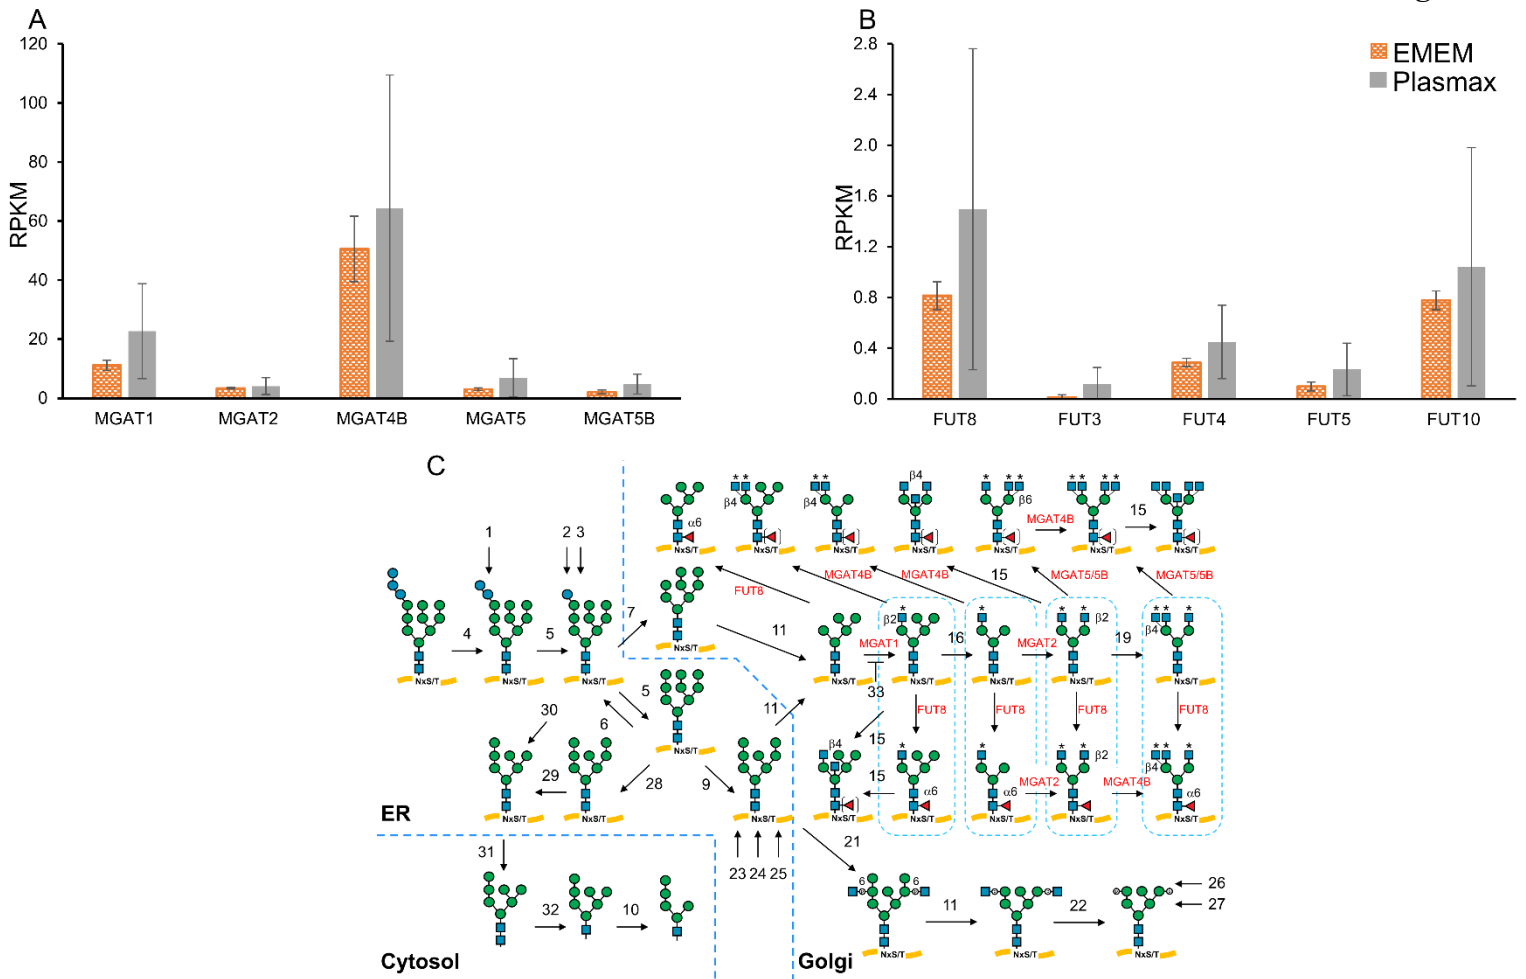

**Figure S6.** Transcript expressions of CRL cell line. **(A)** *N*-acetylglucosaminyltransferases in EMEM and Plasmax; **(B)** Fucosyltransferases in EMEM and Plasmax. **(C)** Synthesis pathways of *N*-glycan processing and branching. The labeled transcripts of transferases depict the processes of attaching GlcNAc to mannose on core structure, and core-fucosylation, catalyzed by MGATs, and FUT8, respectively. The synthesis pathways are acquired from GlycoMaple (<https://glycosmos.org/glycomaple/index>).

**Figure S7**

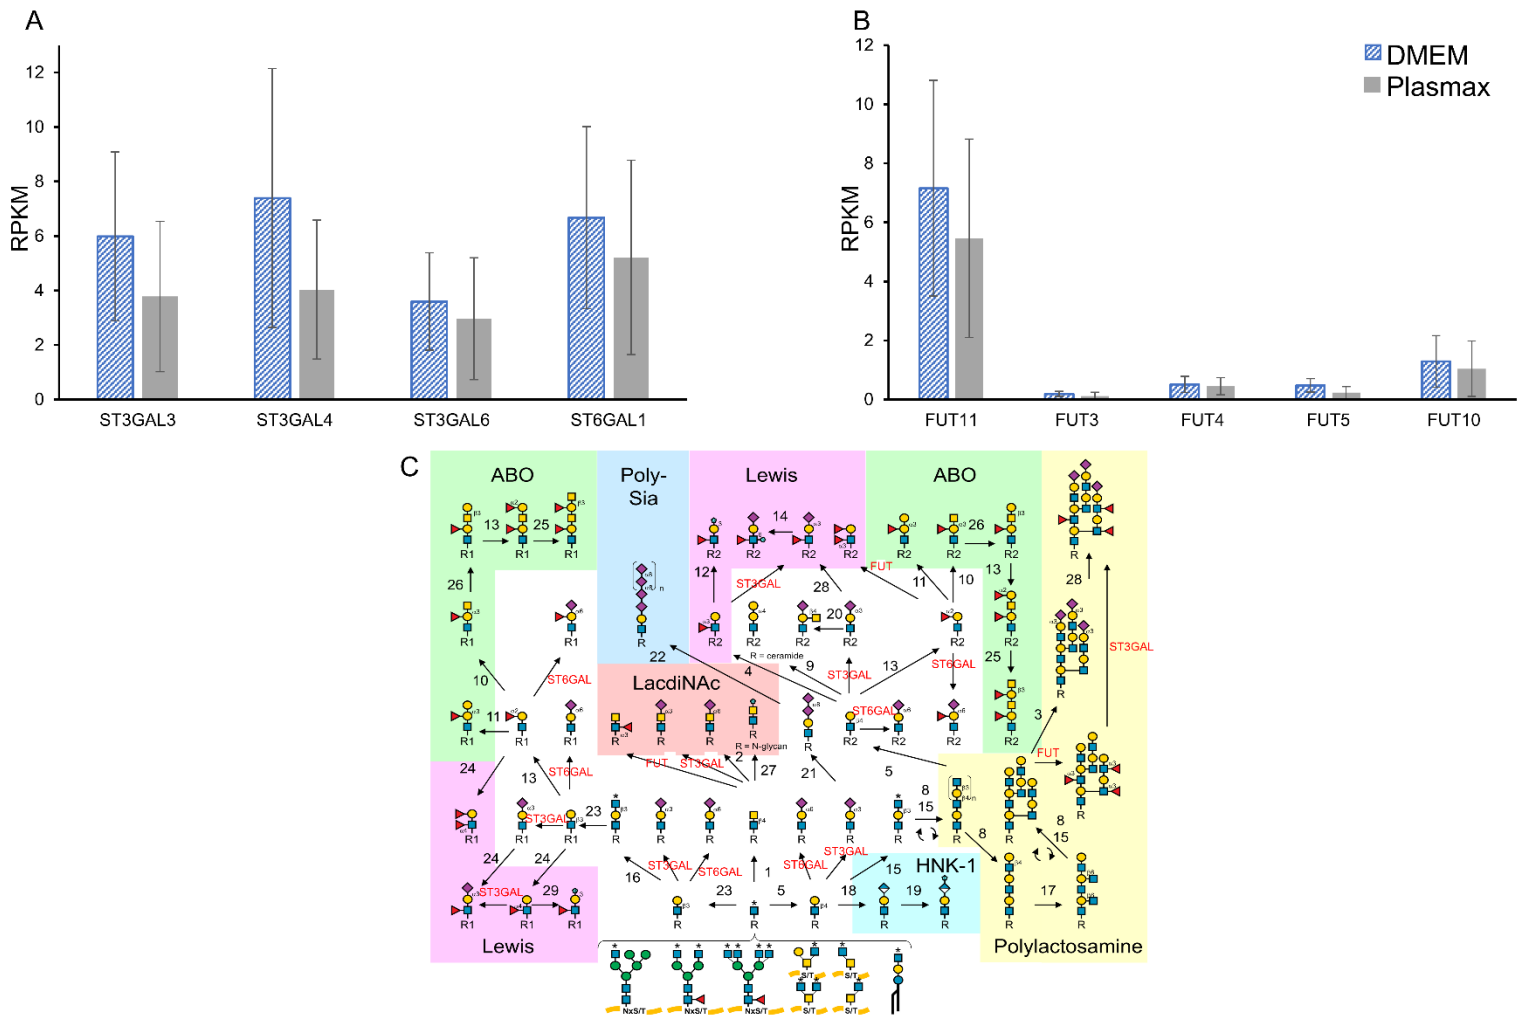

**Figure S7.** Transcript expressions of **(A)** Sialyltransferases in 231BR cell line cultivated by DMEM and Plasmex; **(B)** Fucosyltransferases in CRL cell line cultivated by DMEM and Plasmex. **(C)** Synthesis pathways of complex capping *N*- and *O*-glycans. The labeled transcripts of transferases depict the processes of sialylation catalyzed by ST3GAL or ST6GAL, and fucosylation catalyzed by FUTs. The synthesis pathways are acquired from GlycoMaple (<https://glycosmos.org/glycomaple/index>).
